# Supplementary material for: Regiodivergent synthesis of trisubstituted furans through Tf2O-catalyzed Friedel–Crafts acylation: a tool for access to tetrahydrofuranlignan analogues
Source: Royal Society of Chemistry journal article supplement (doi:10.1039/c1ob06560b), 2011-11-03

# Regiodivergent synthesis of trisubstituted furans through Tf<sub>2</sub>O-catalyzed Friedel-Crafts acylation: a tool for access to tetrahydrofuran lignan analogues

Daniela Comegna,\* Marina DellaGreca,\* M. Rosaria Iesce, Lucio Previtera, Armando Zarrelli, and Simona Zuppolini

*Dipartimento di Chimica Organica e Biochimica, Università Federico II, Complesso Universitario di Monte S. Angelo, via Cinthia 4, I-80126 Naples, Italy. Fax: +39 081 6741393; Tel: +39 081 674162; E-mail: daniela.comegna@unina.it; [dellagre@unina.it](mailto:dellagre@unina.it).*

## SUPPORTING INFORMATION

### Table of contents

#### 1D NMR Spectra:

<sup>1</sup>H and <sup>13</sup>C NMR of compounds **3a-e**, **4a-e**, **5,7-9**.....pg. S2-S15

#### 2D NMR Spectra:

HMQC of compound **3a**..... pg. S16

HMBC of compound **3a**..... pg. S16

HSQC of compound **4a**..... pg. S17

HMBC of compound **4a**.....pg. S17

HMBC of compound **5**.....pg. S18

COSY of compound **9**..... pg. S18

HMBC of compound **9**..... pg. S19

NOESY of compound **9**..... pg. S19

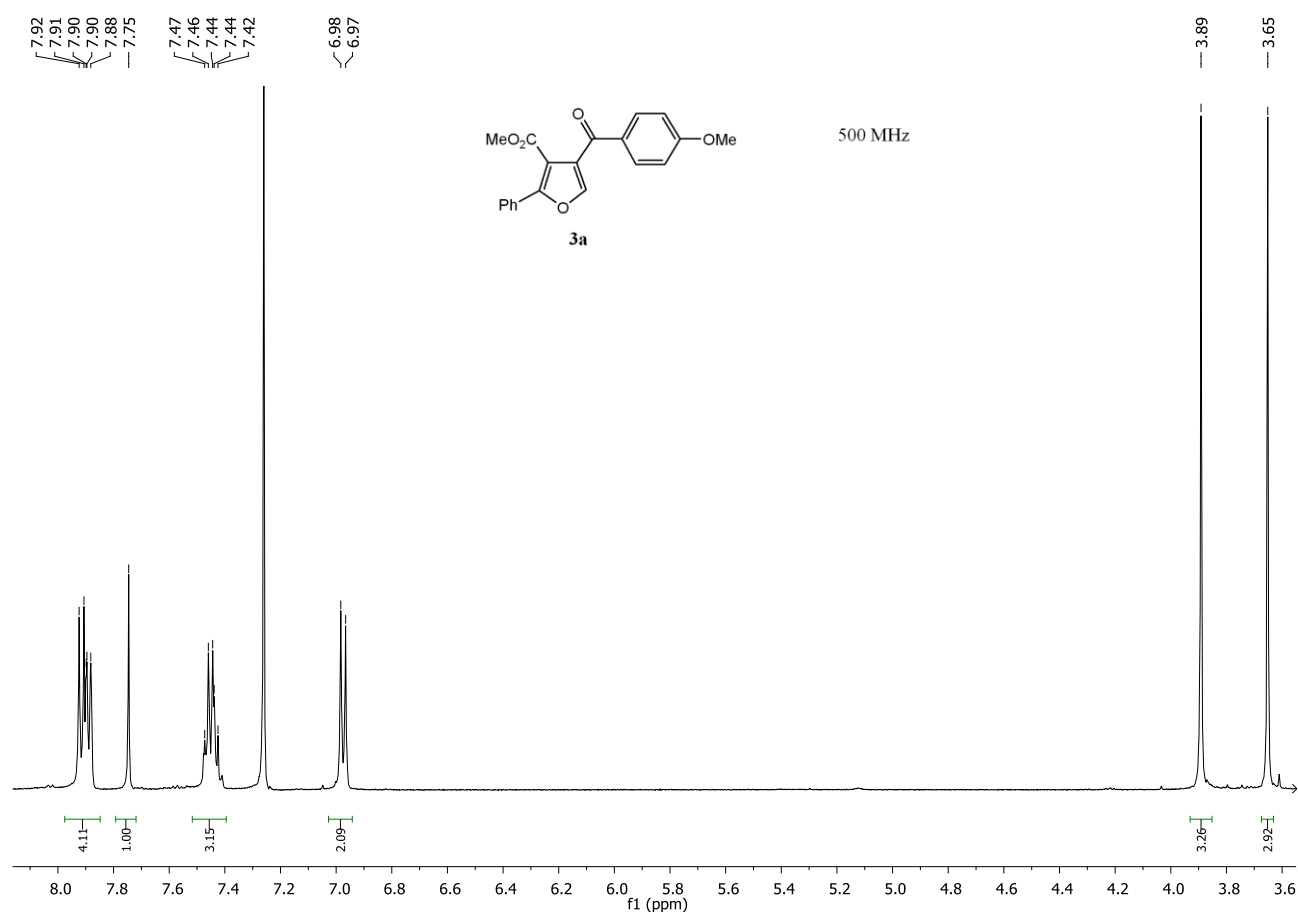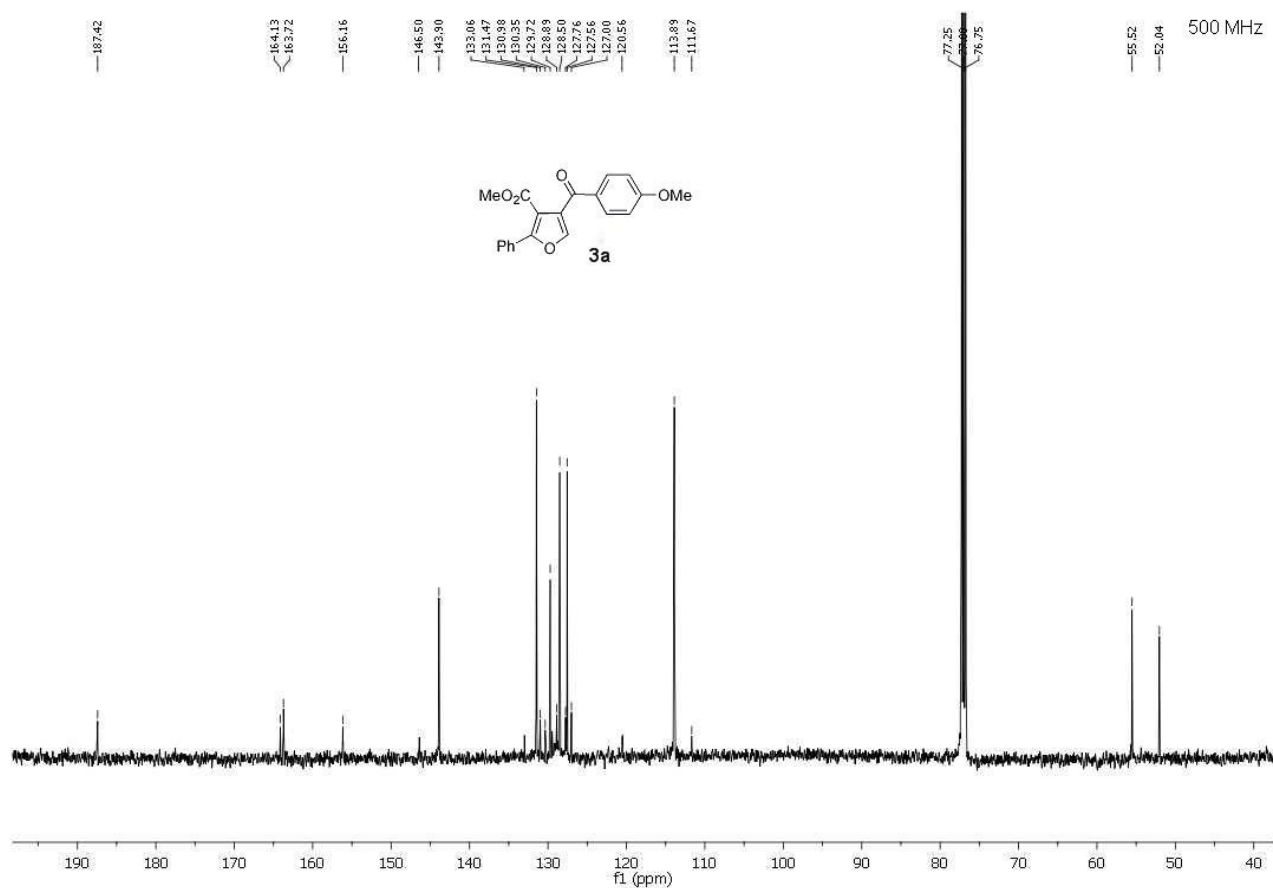

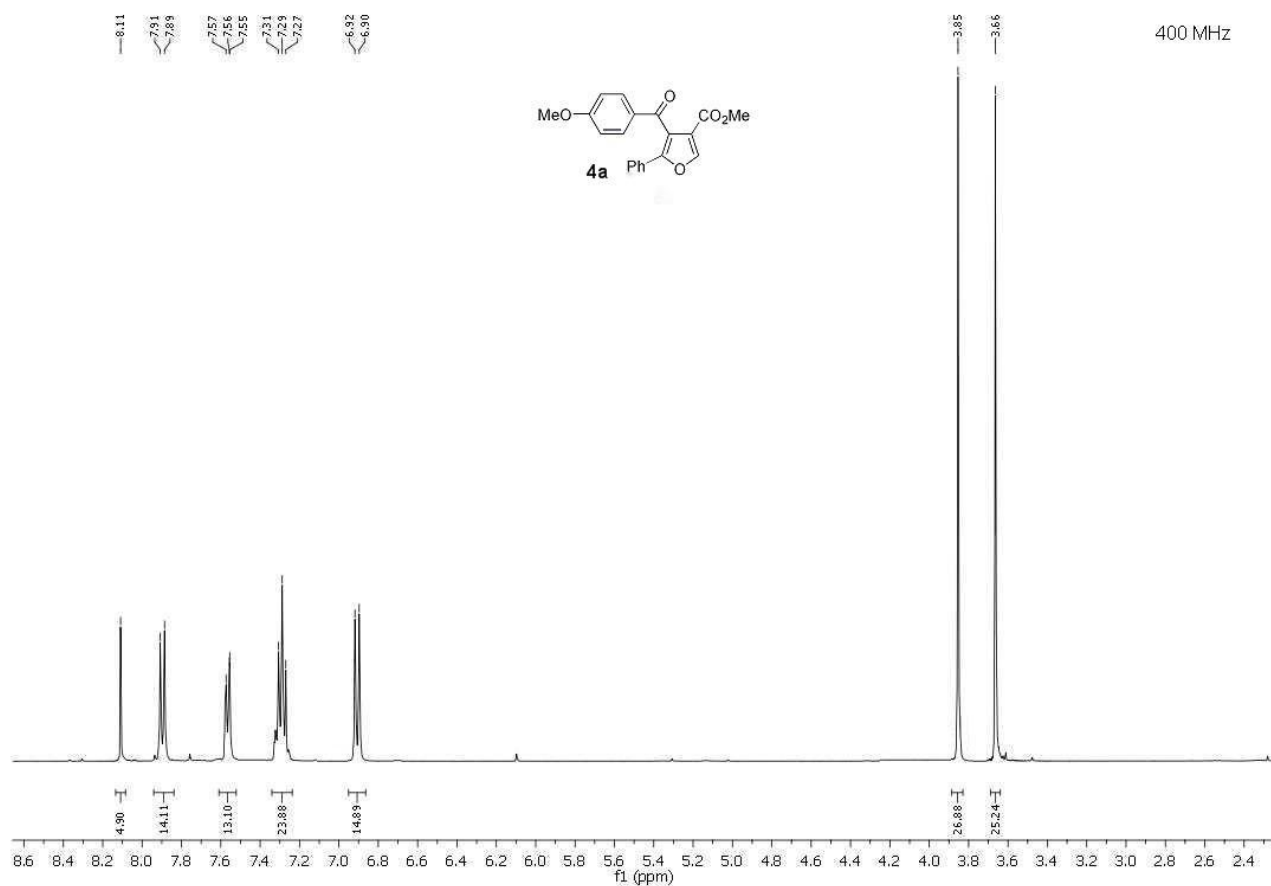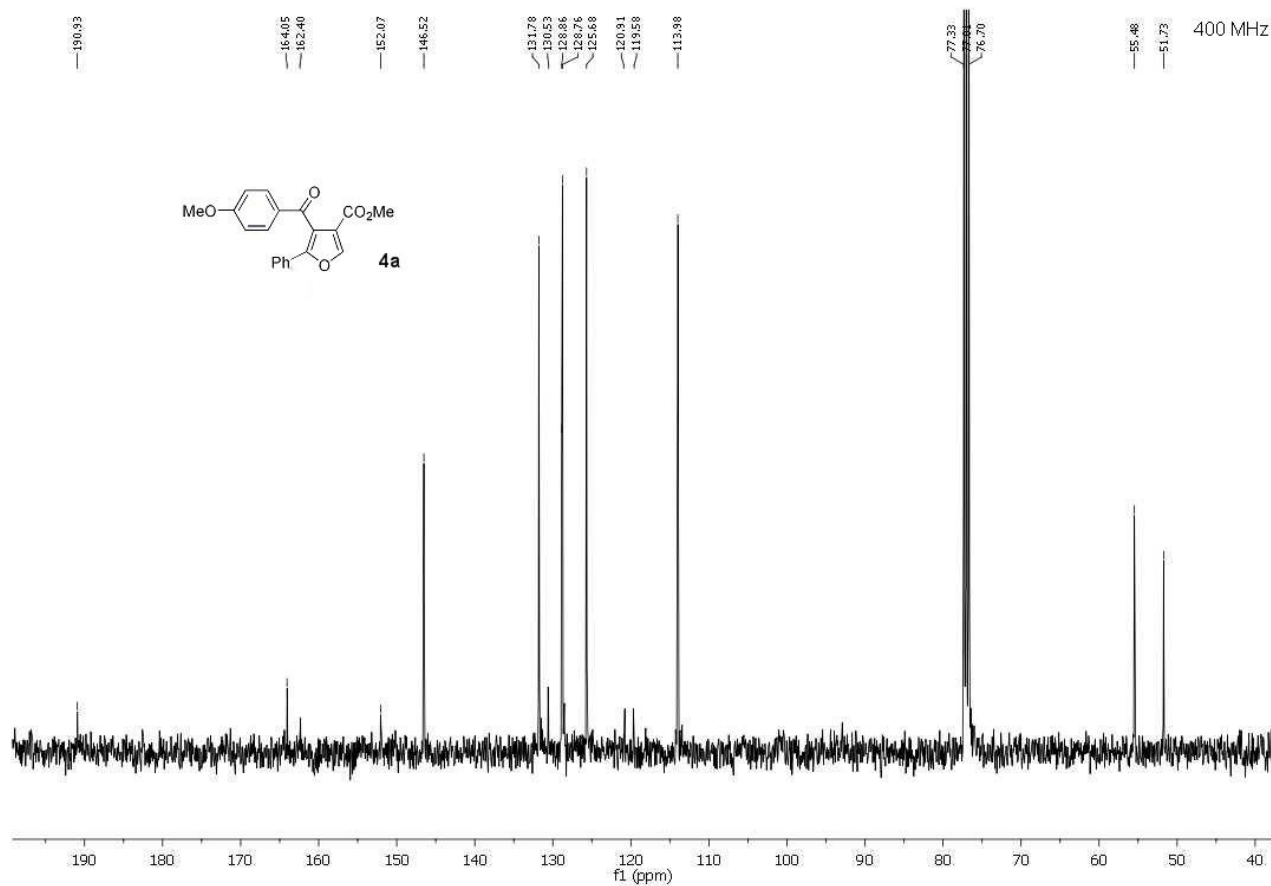

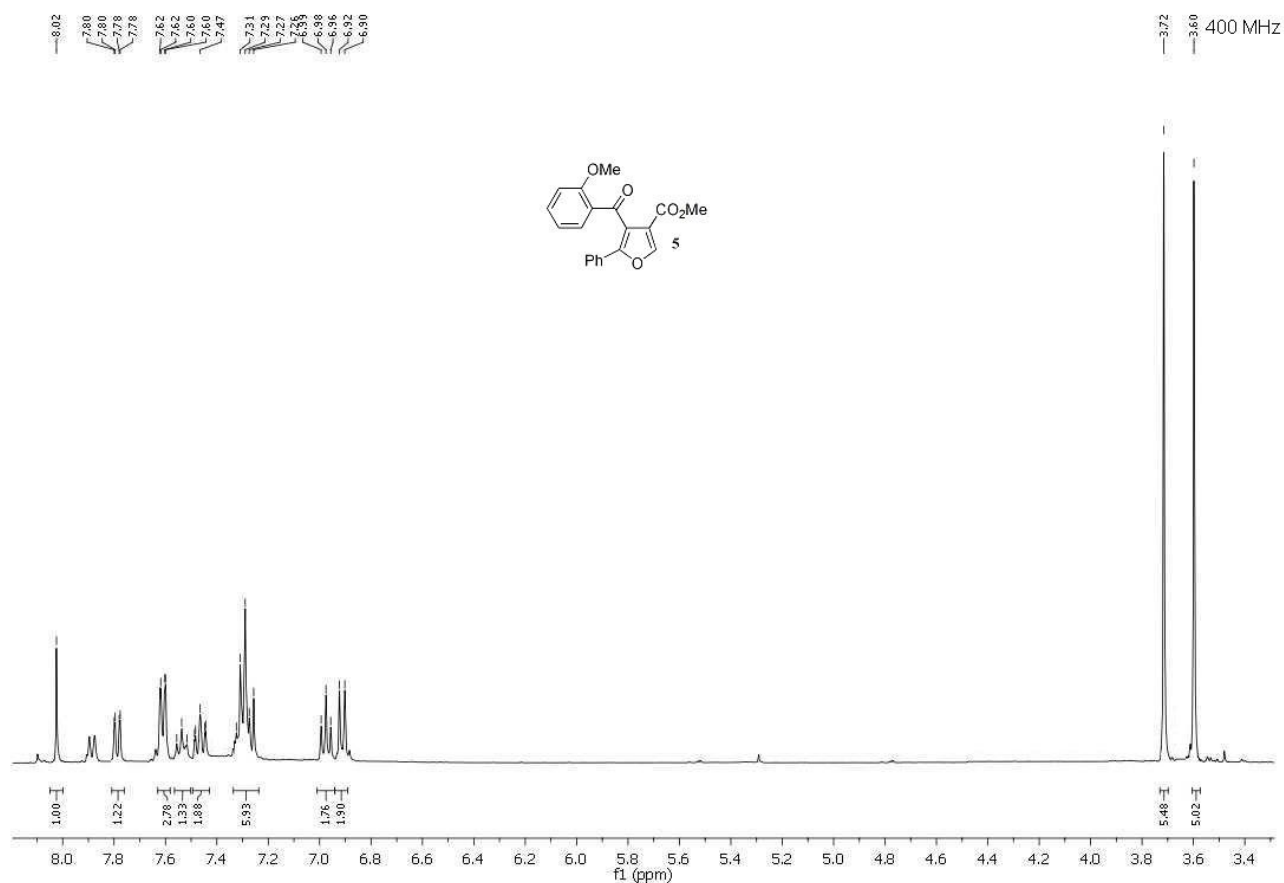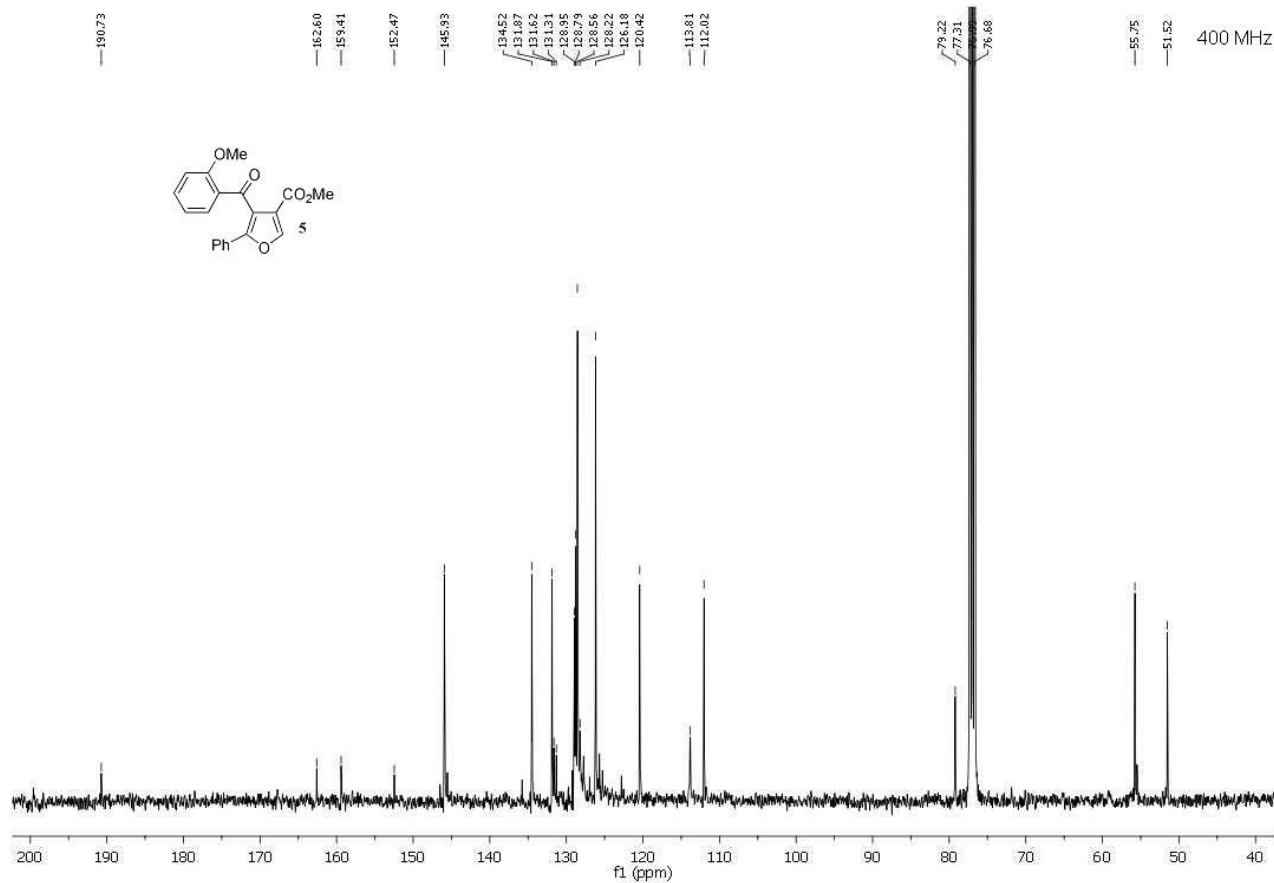

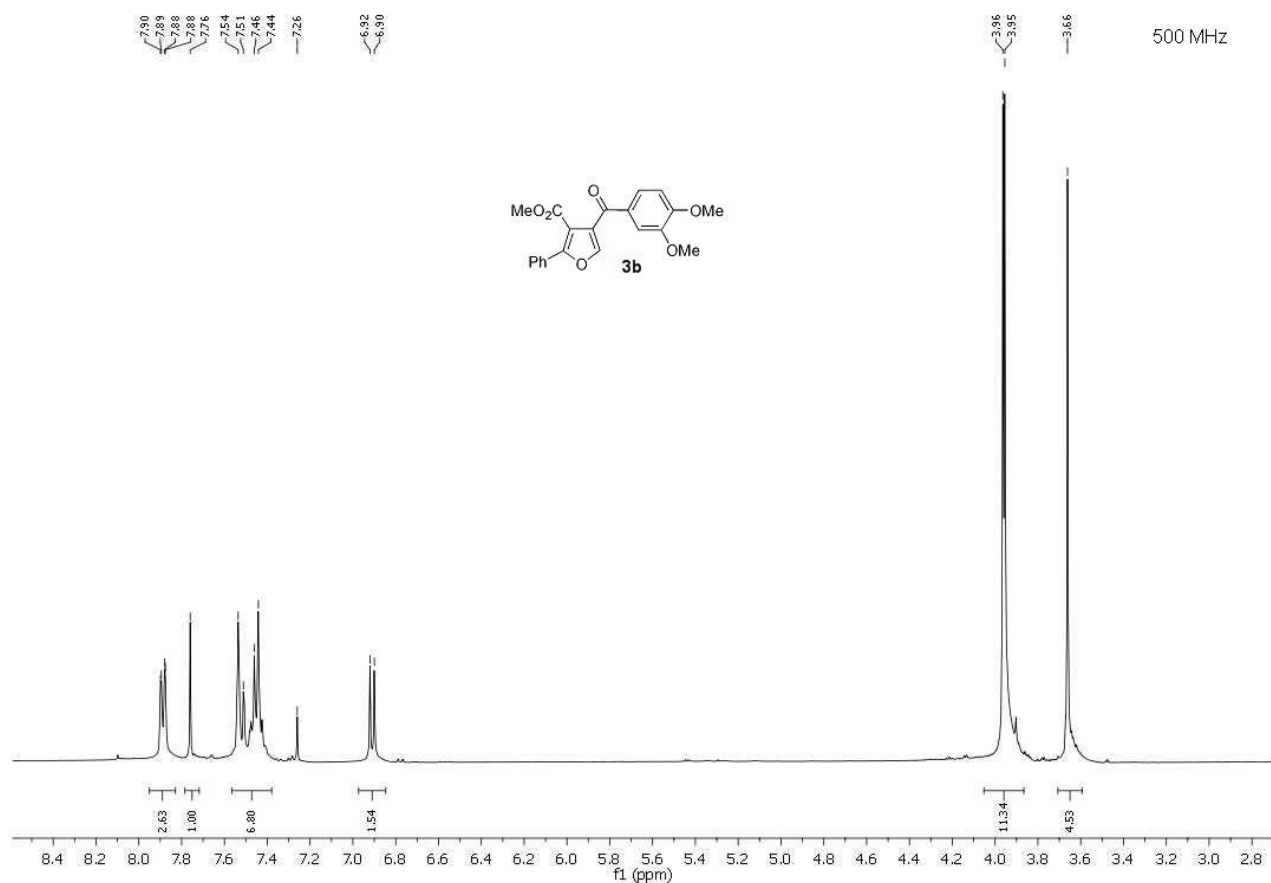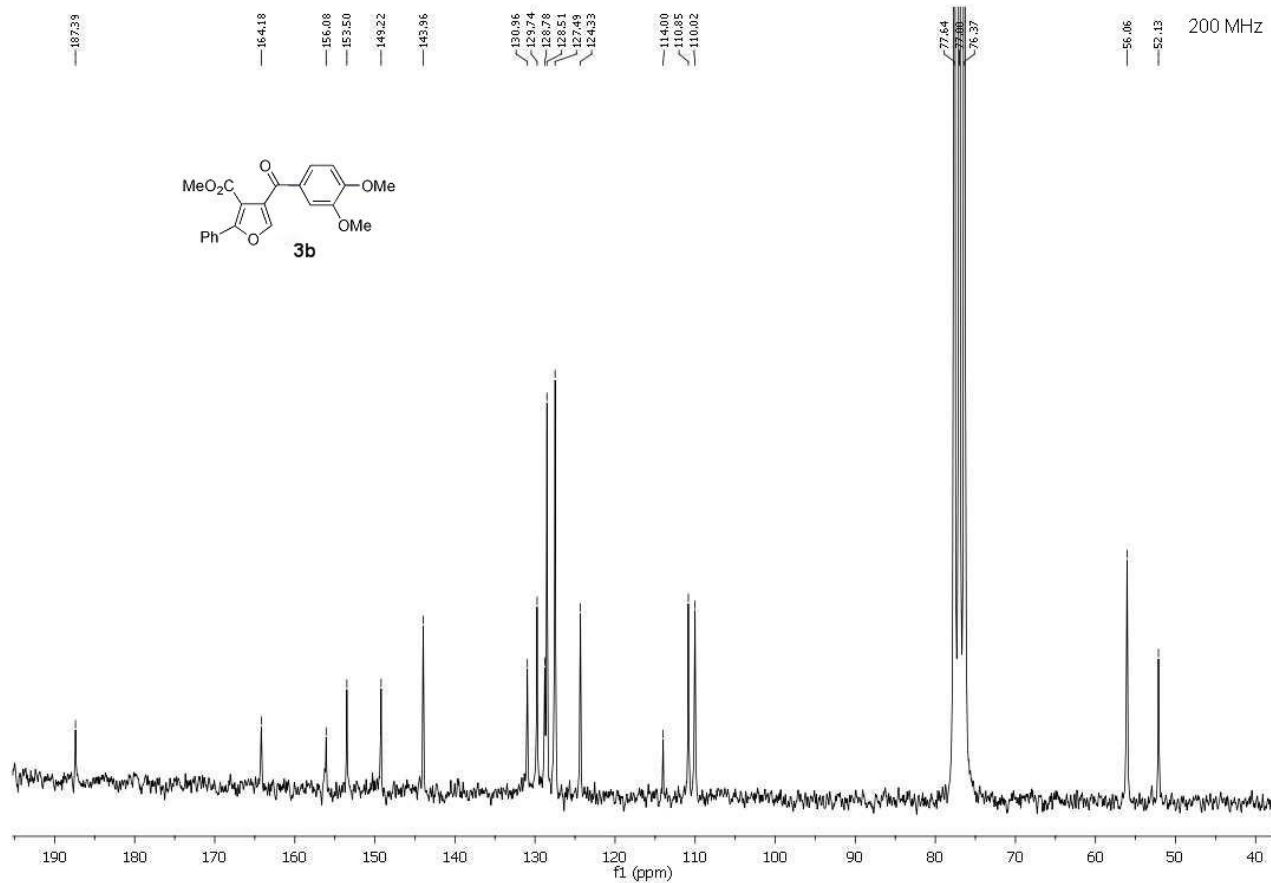

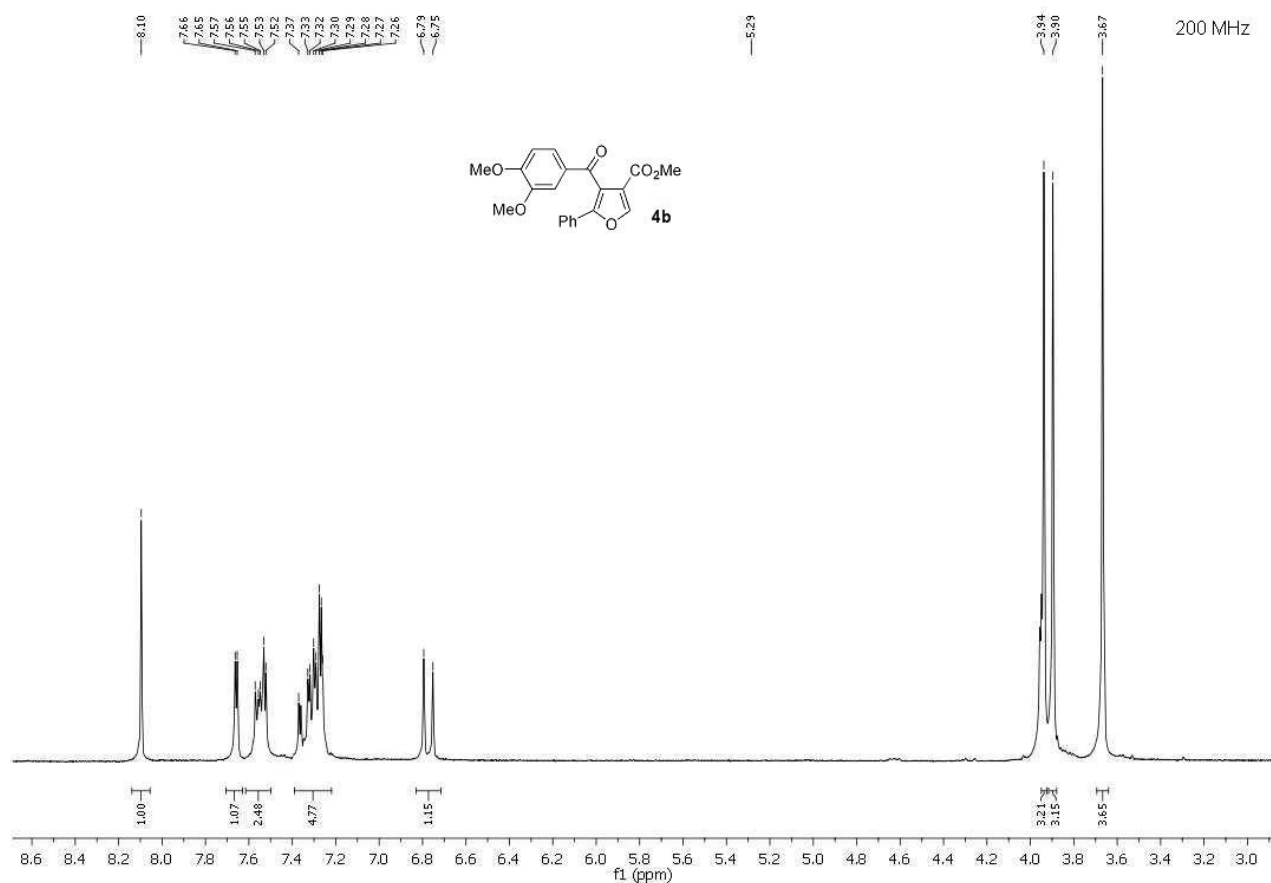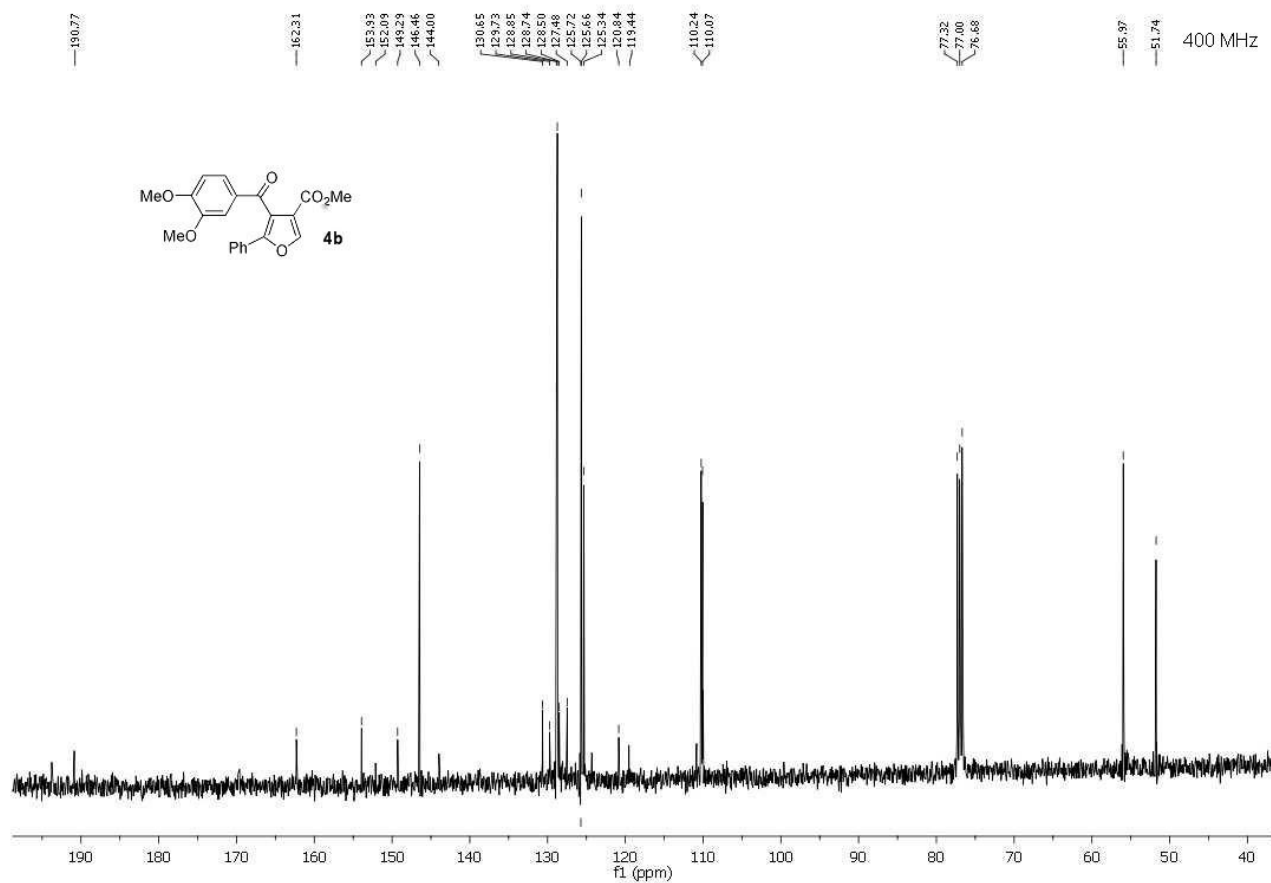

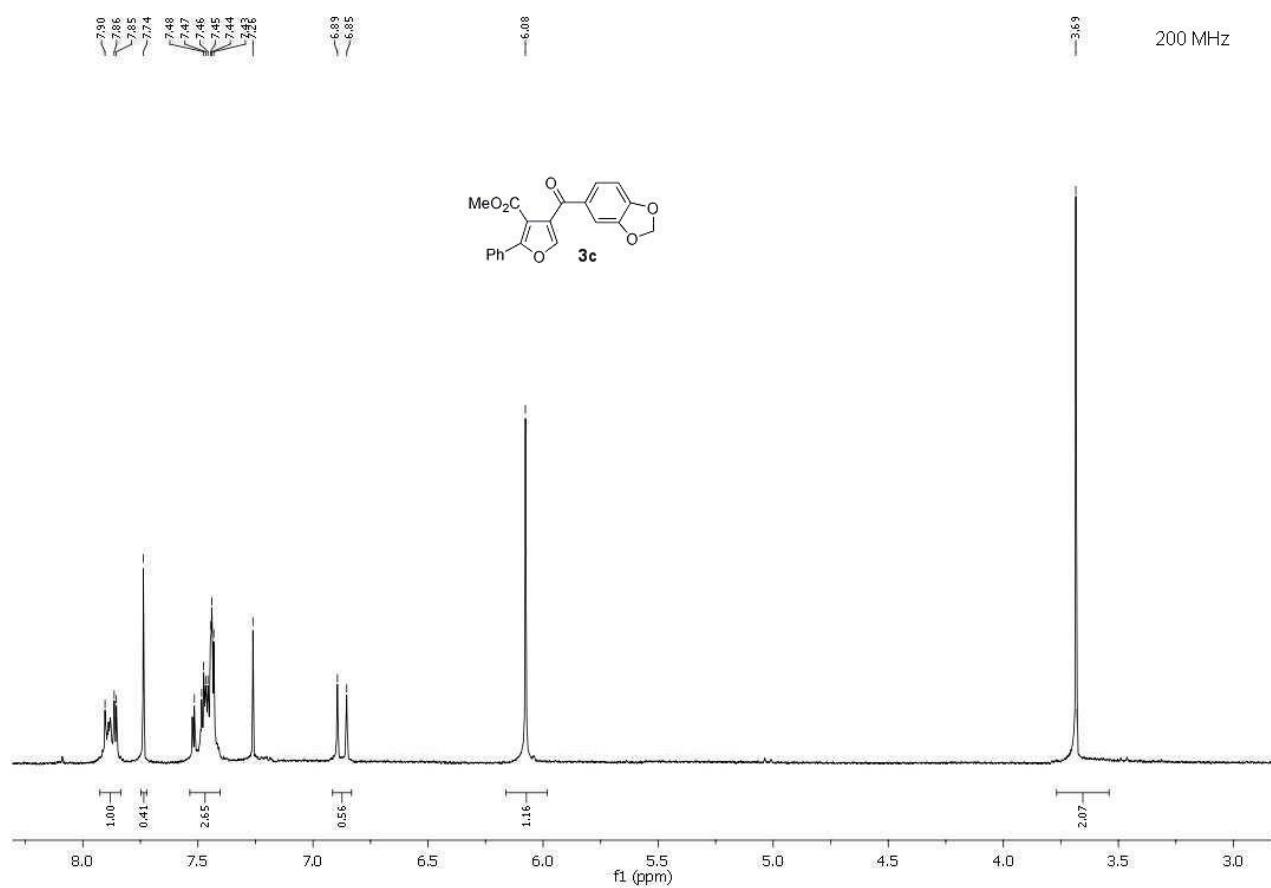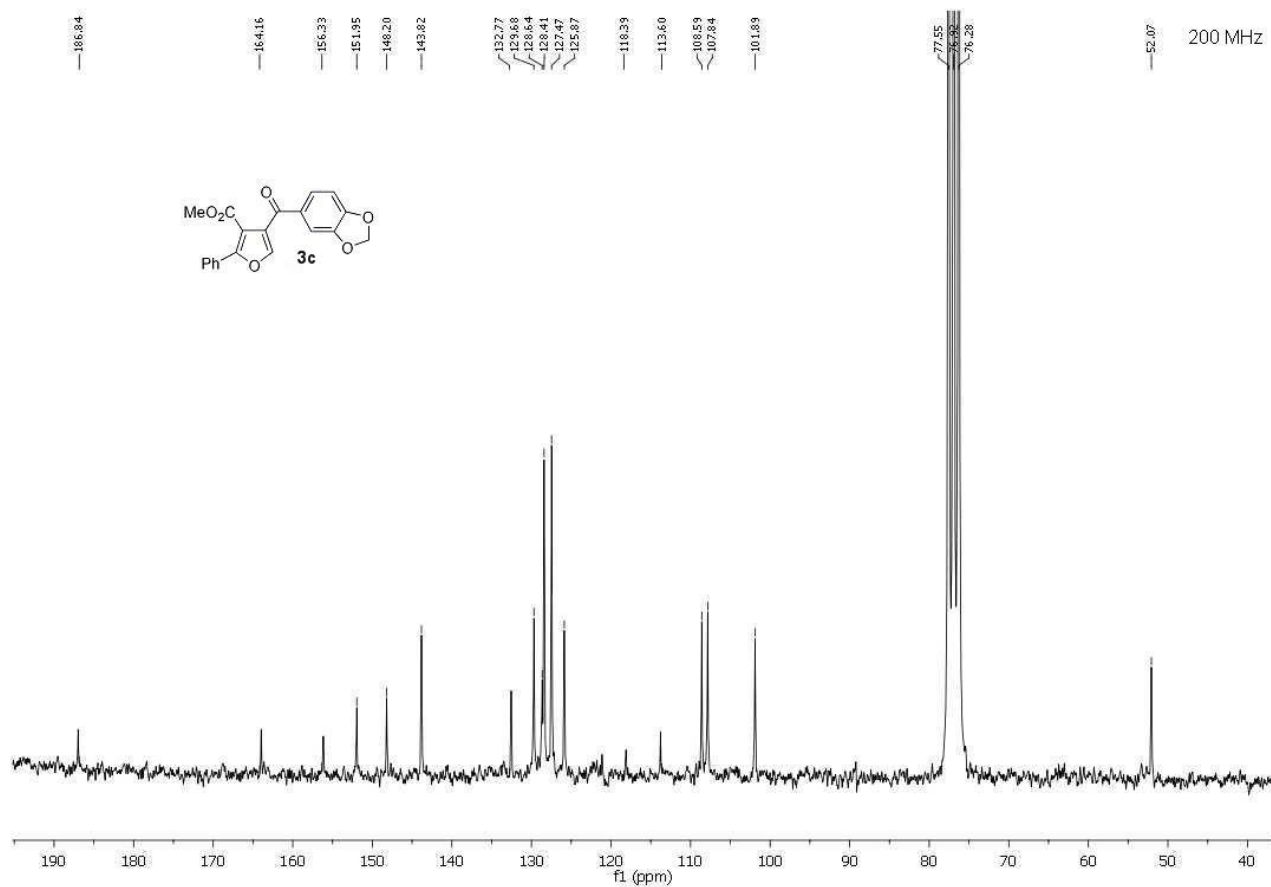

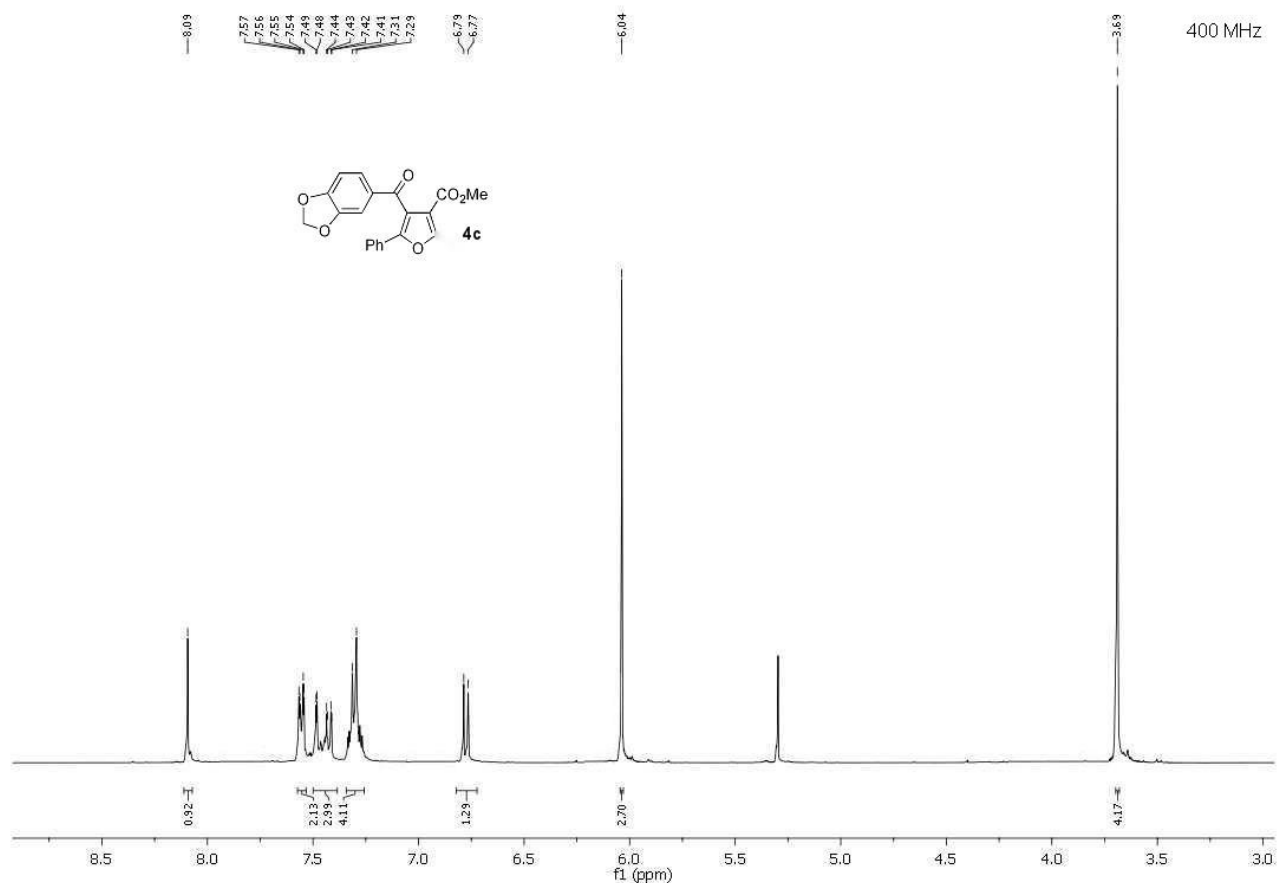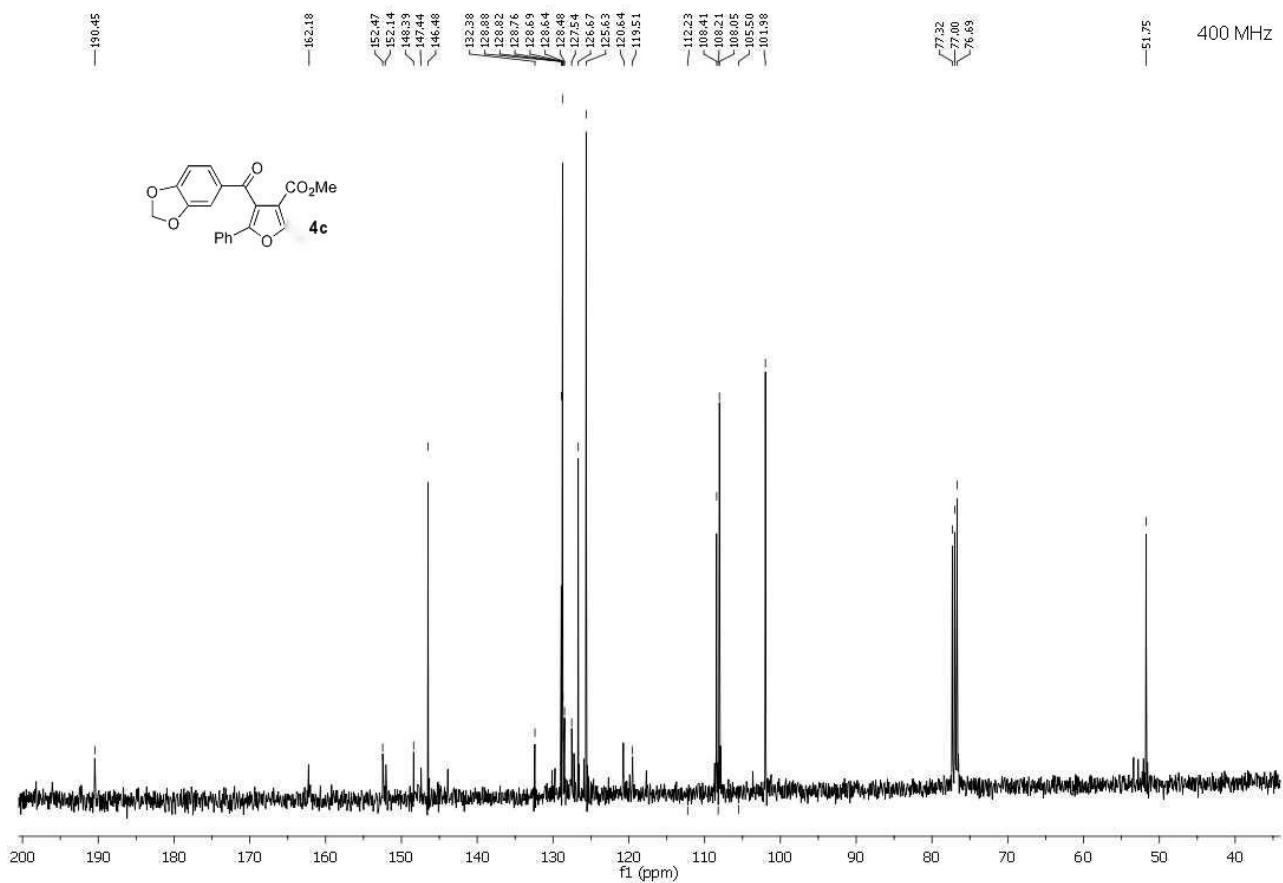



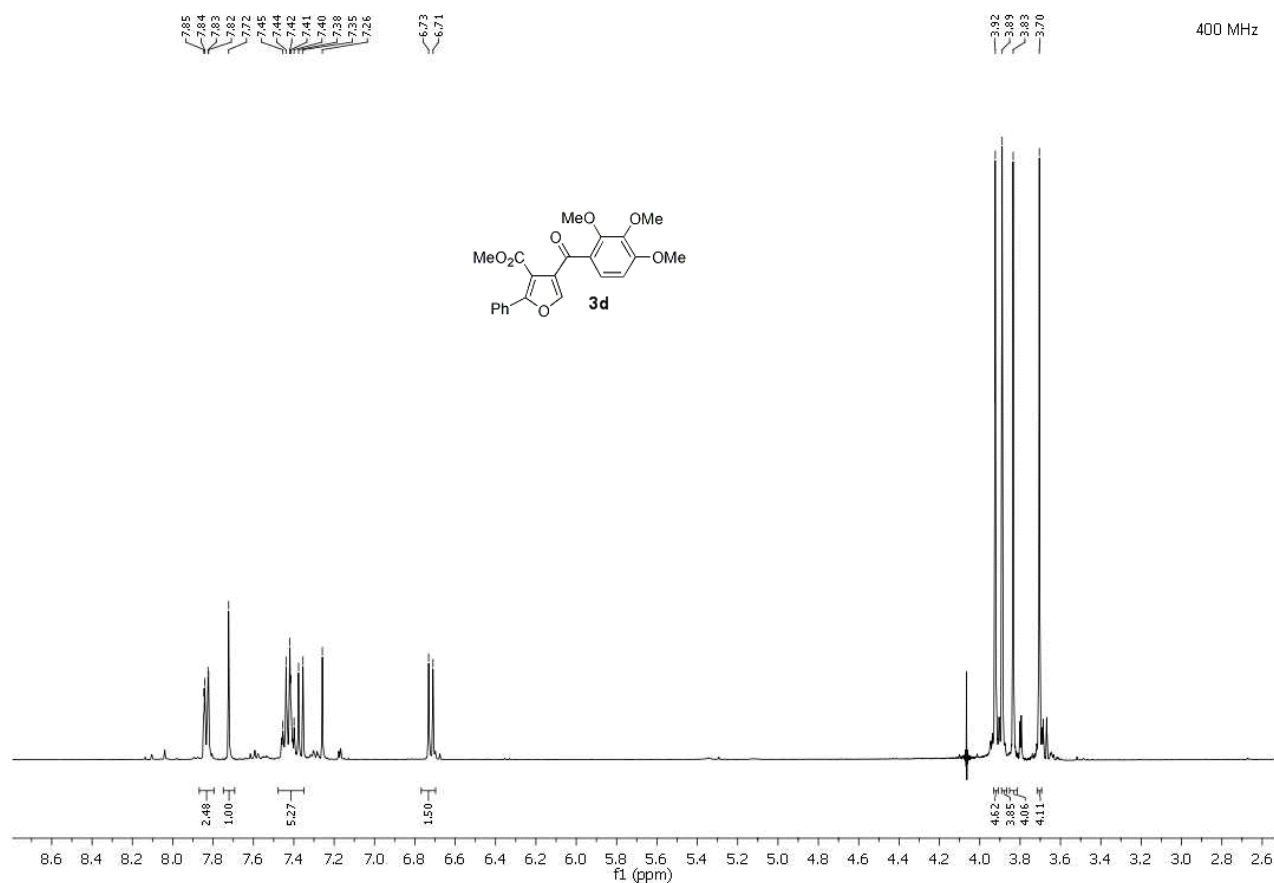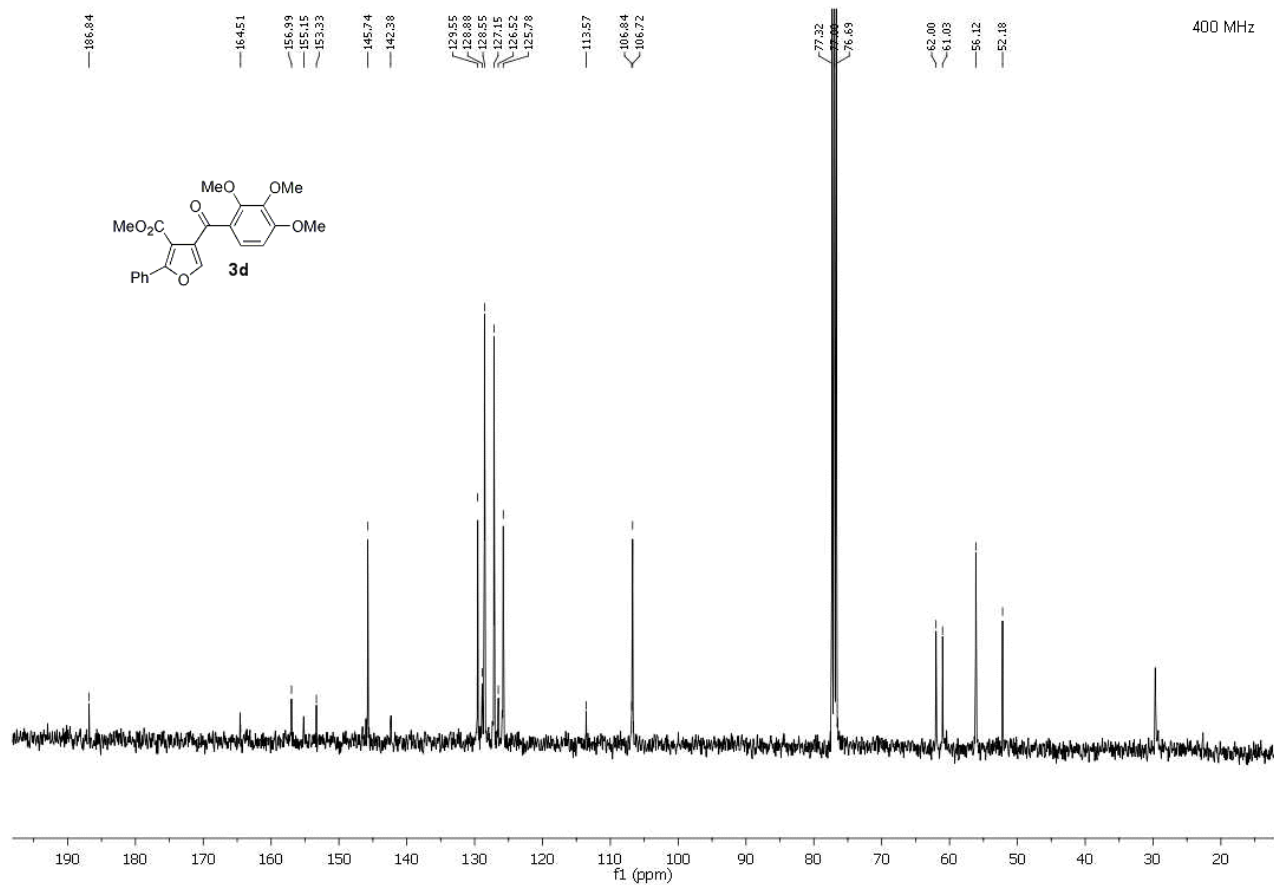

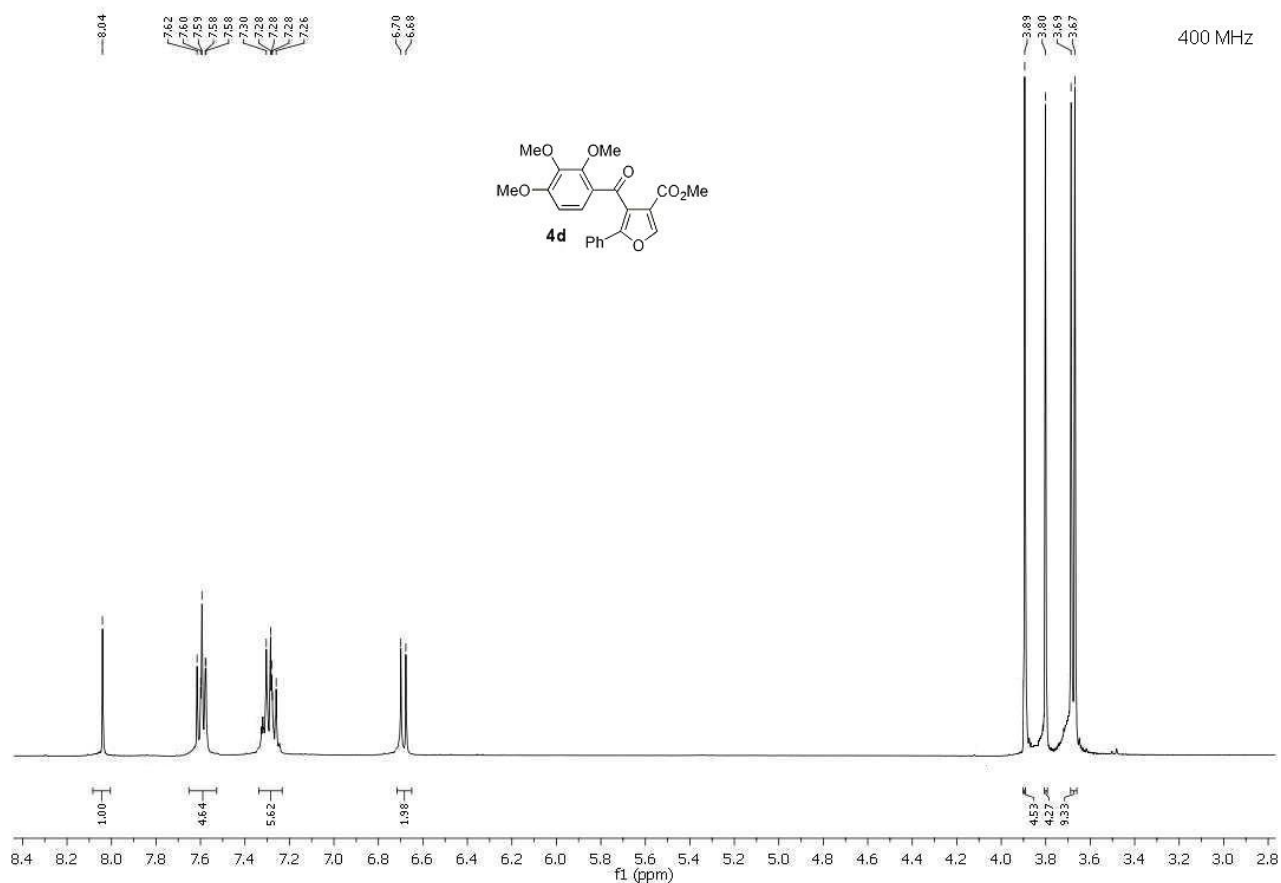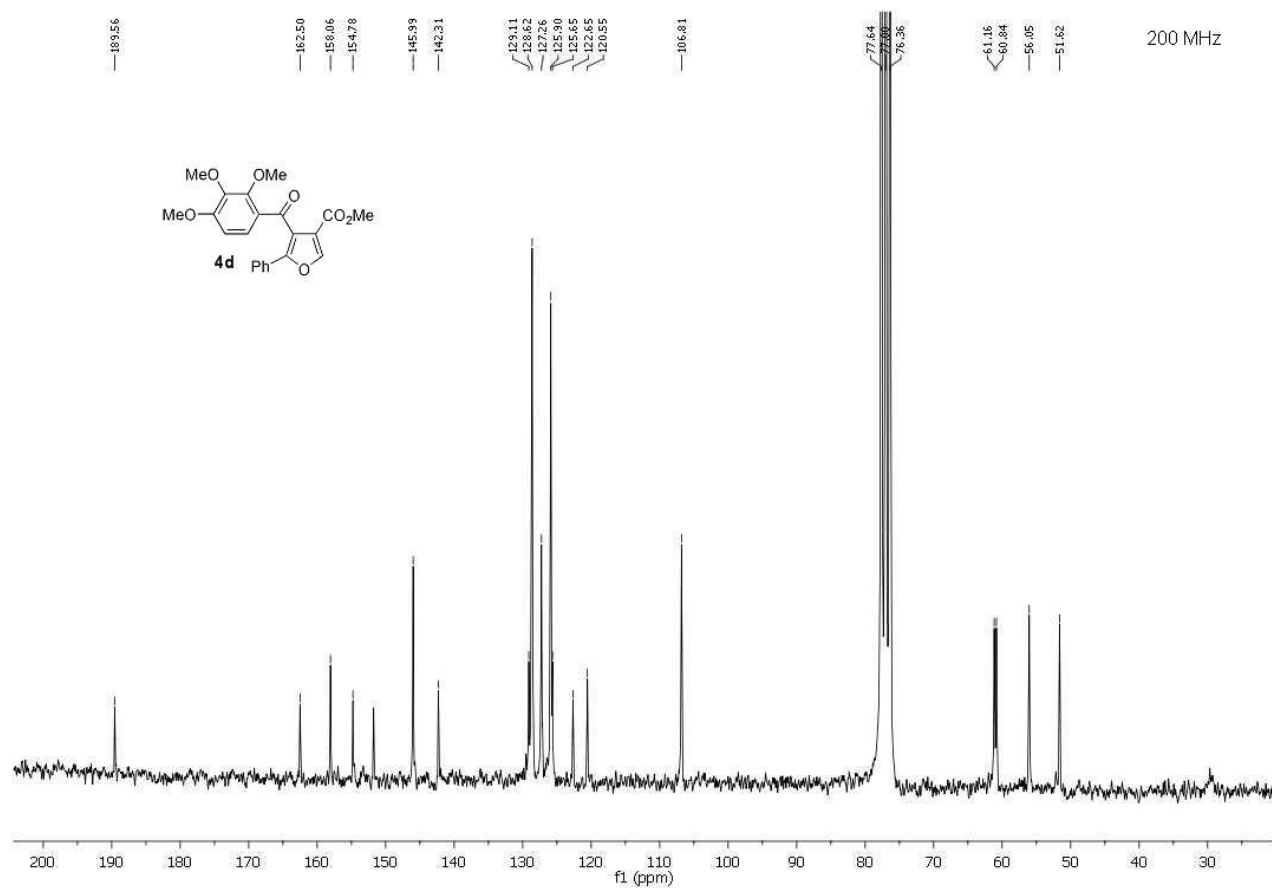

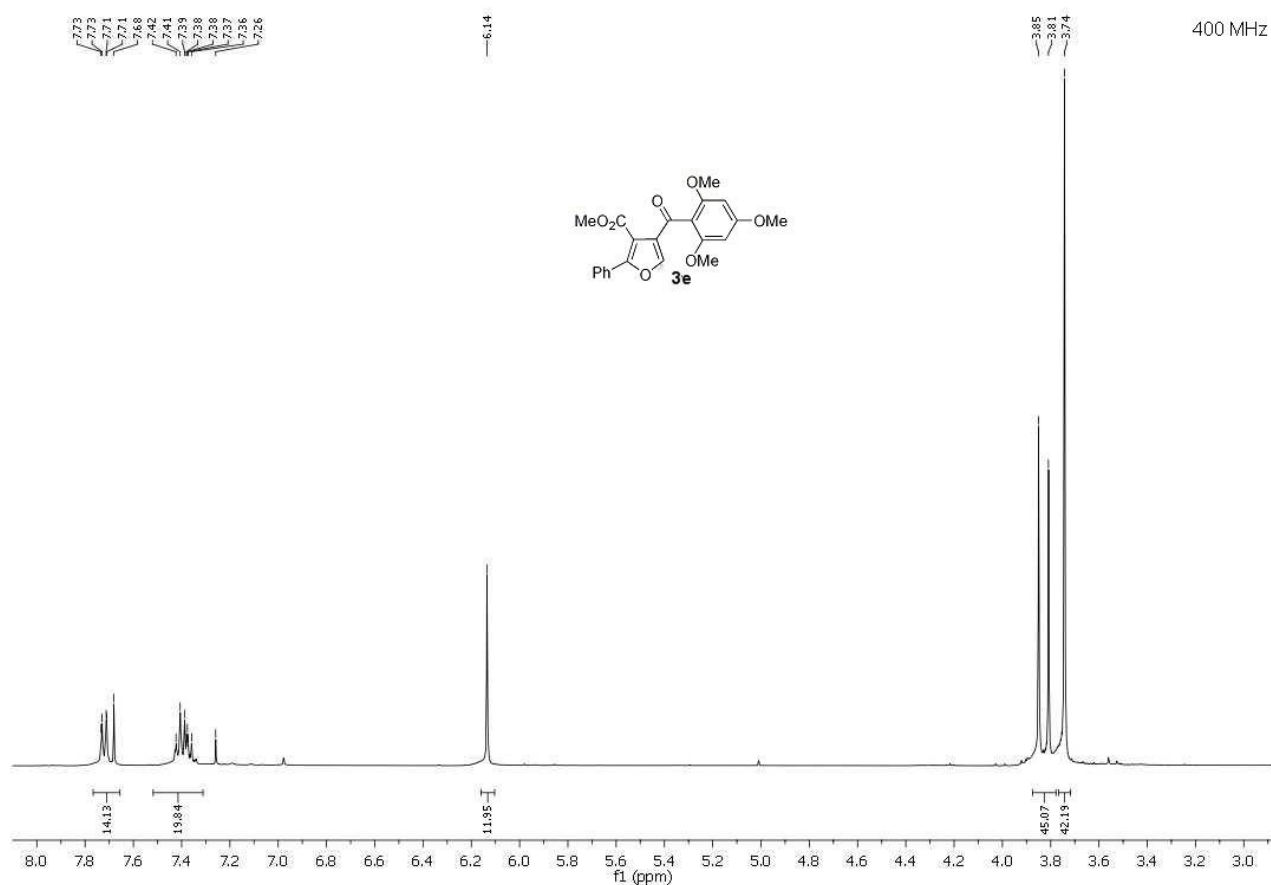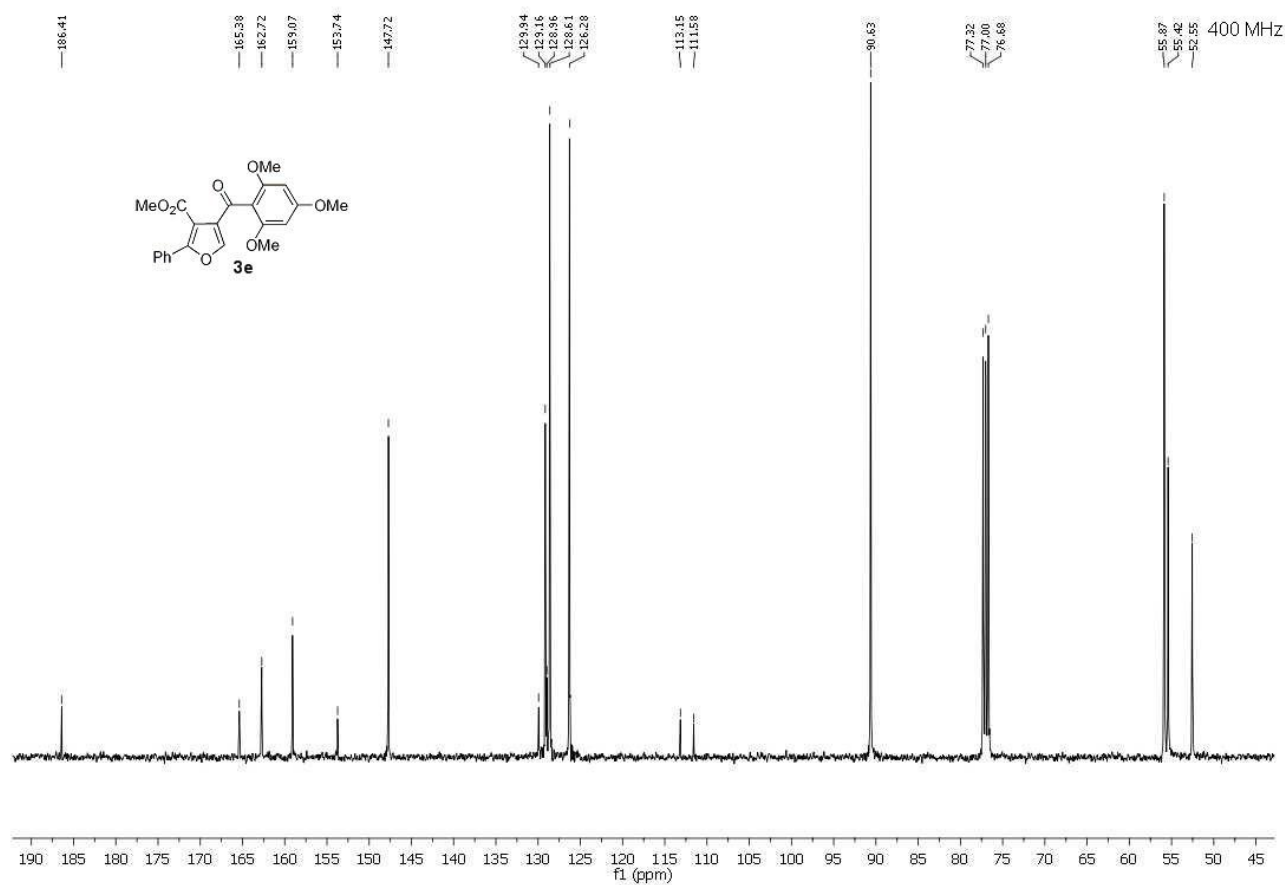

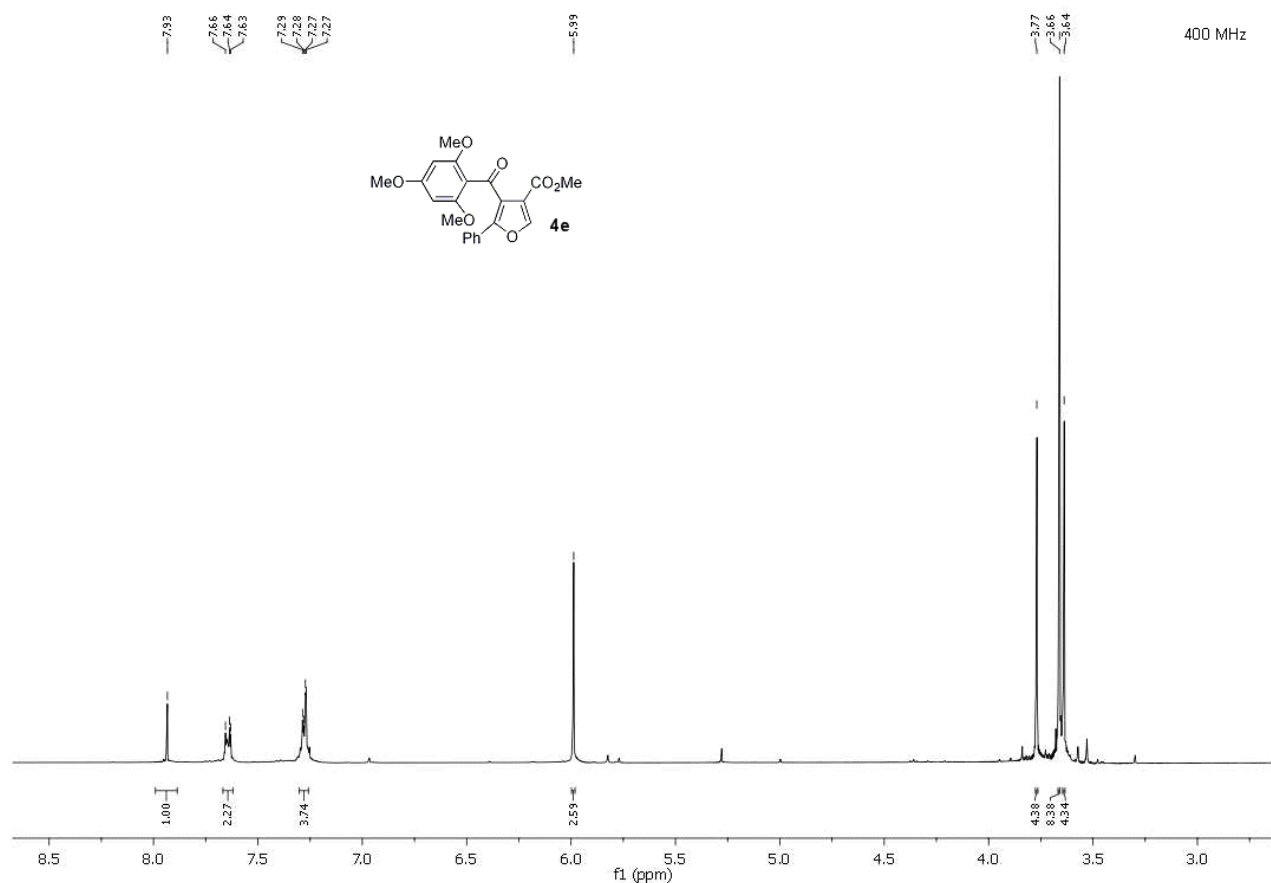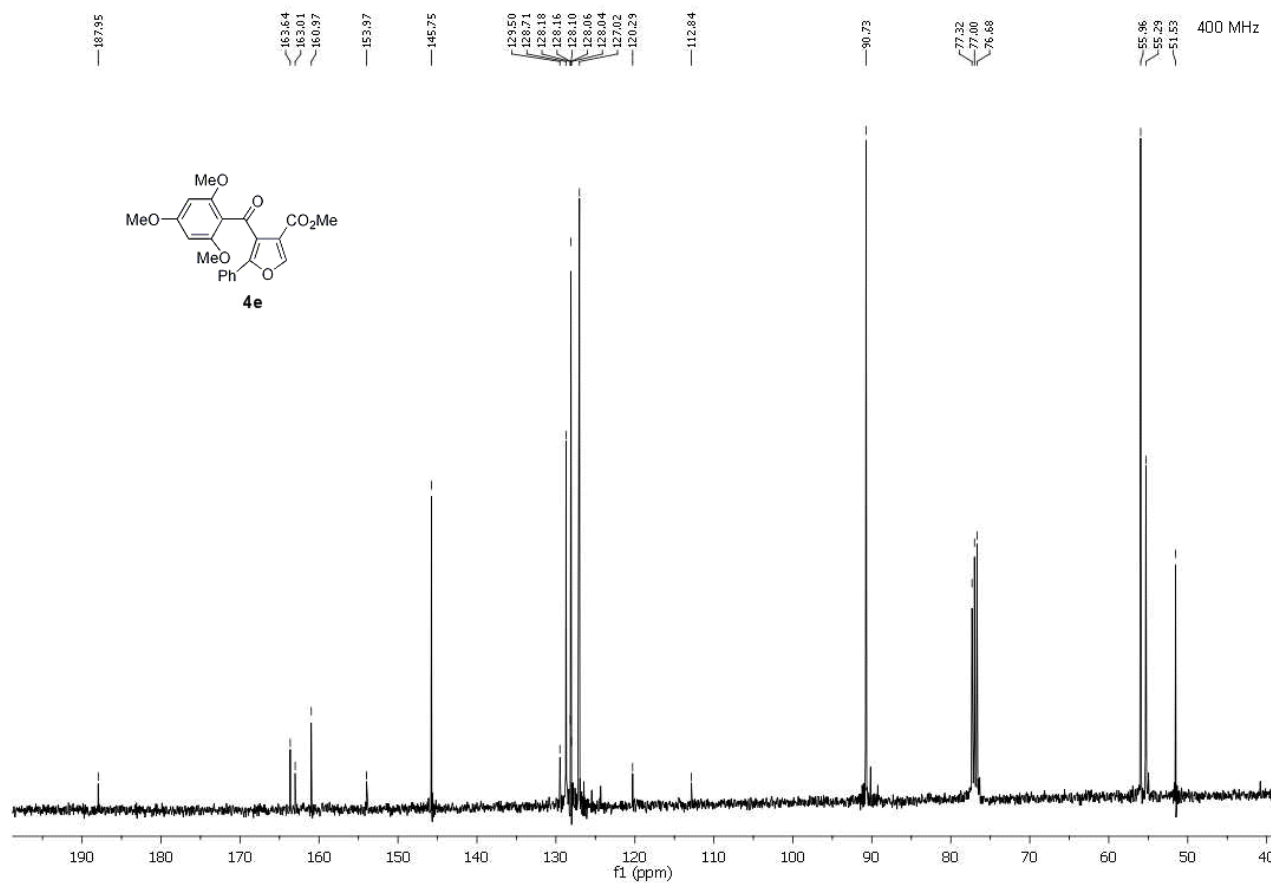

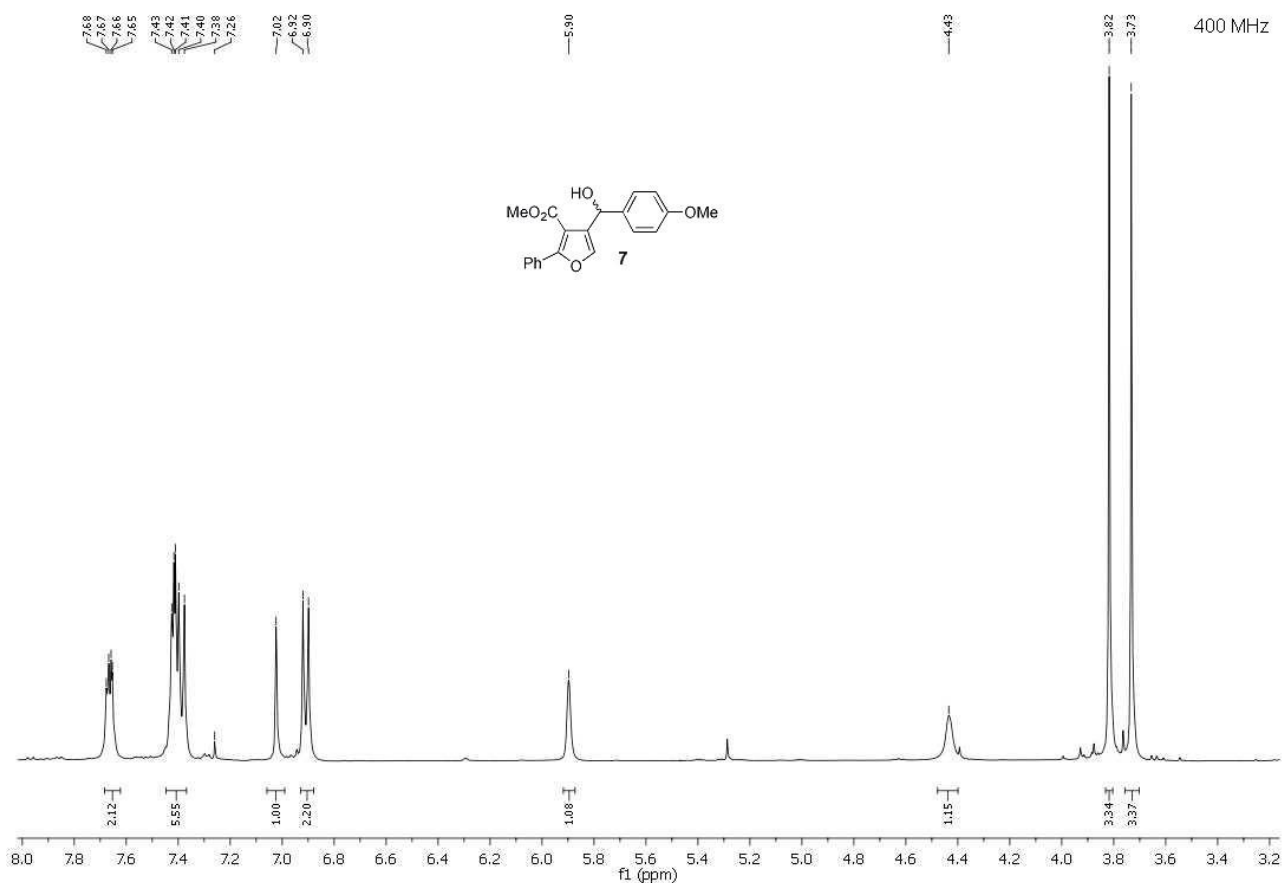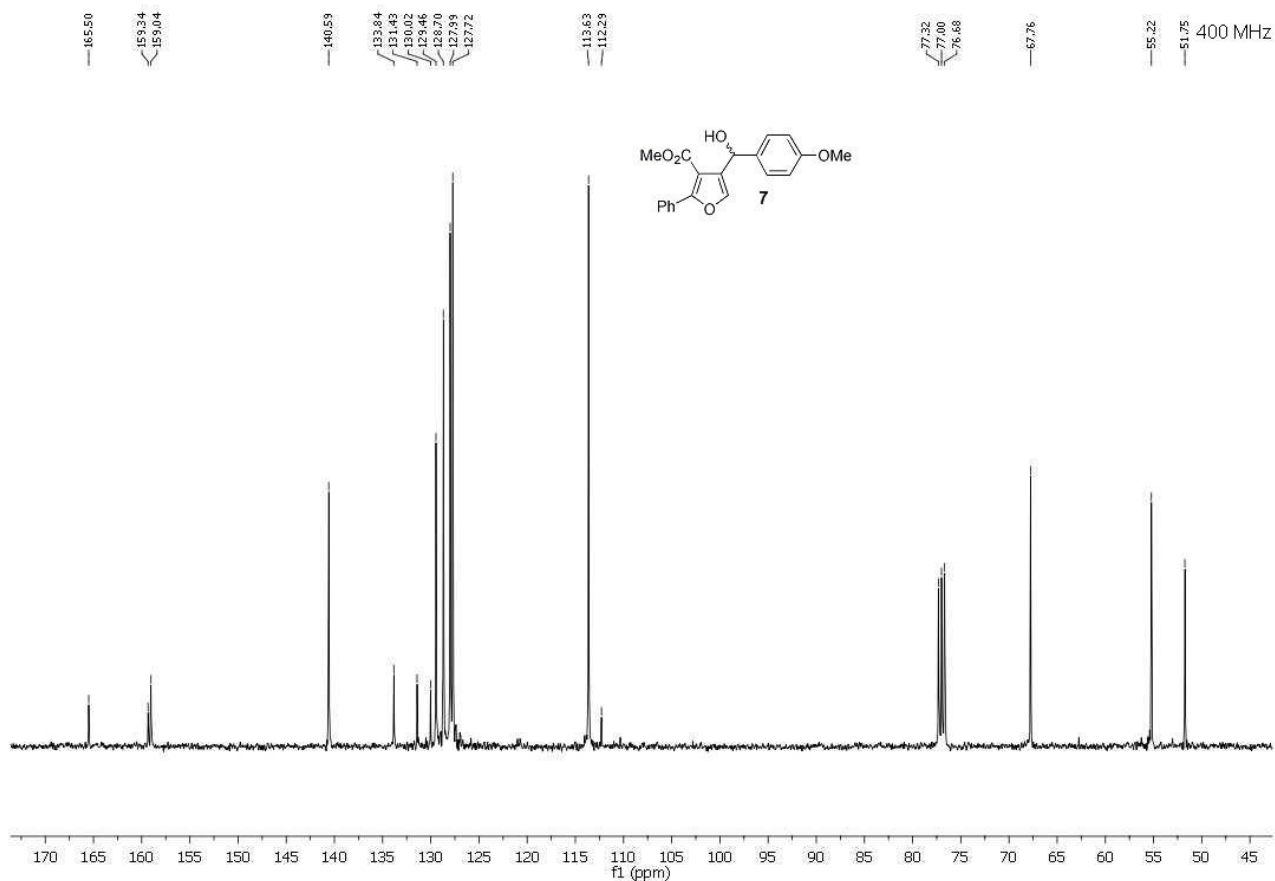

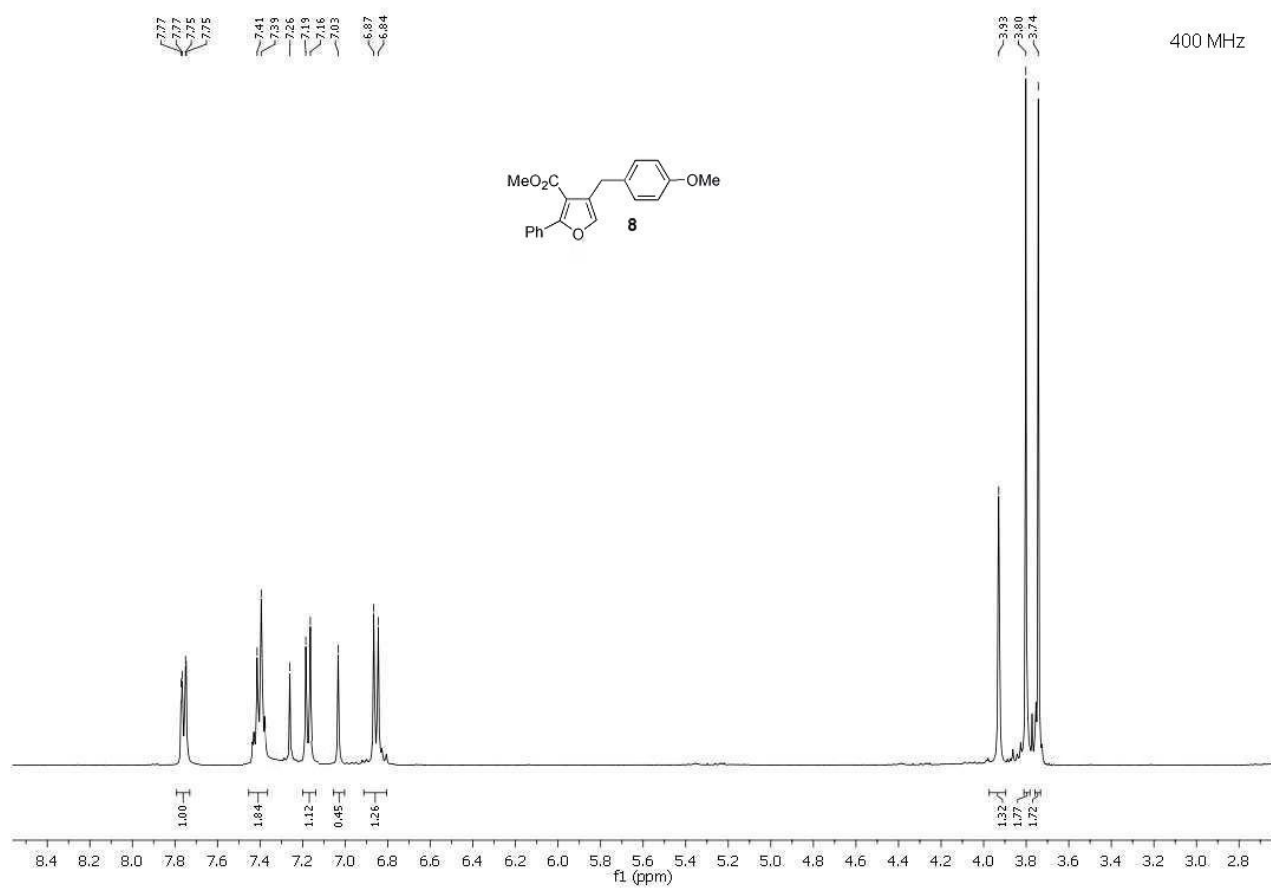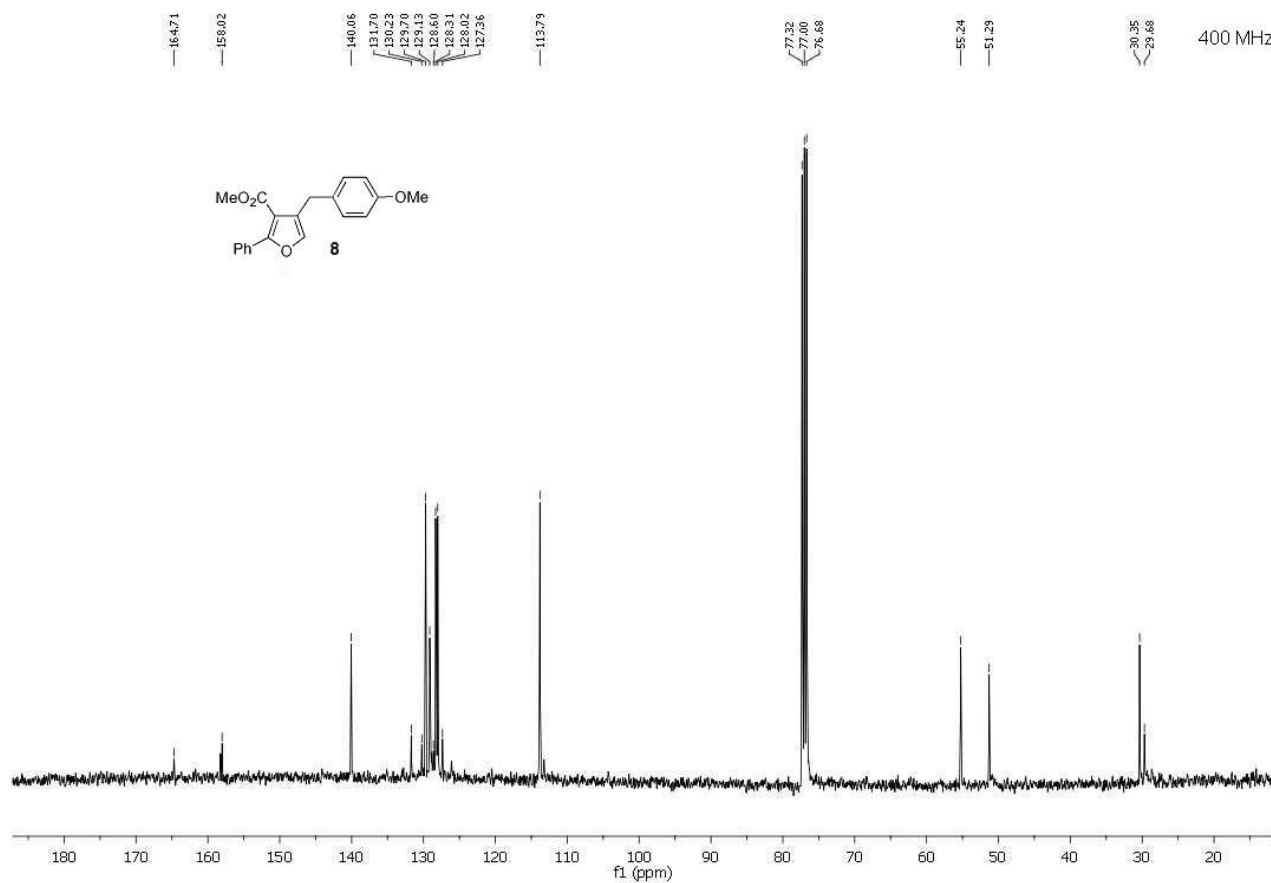

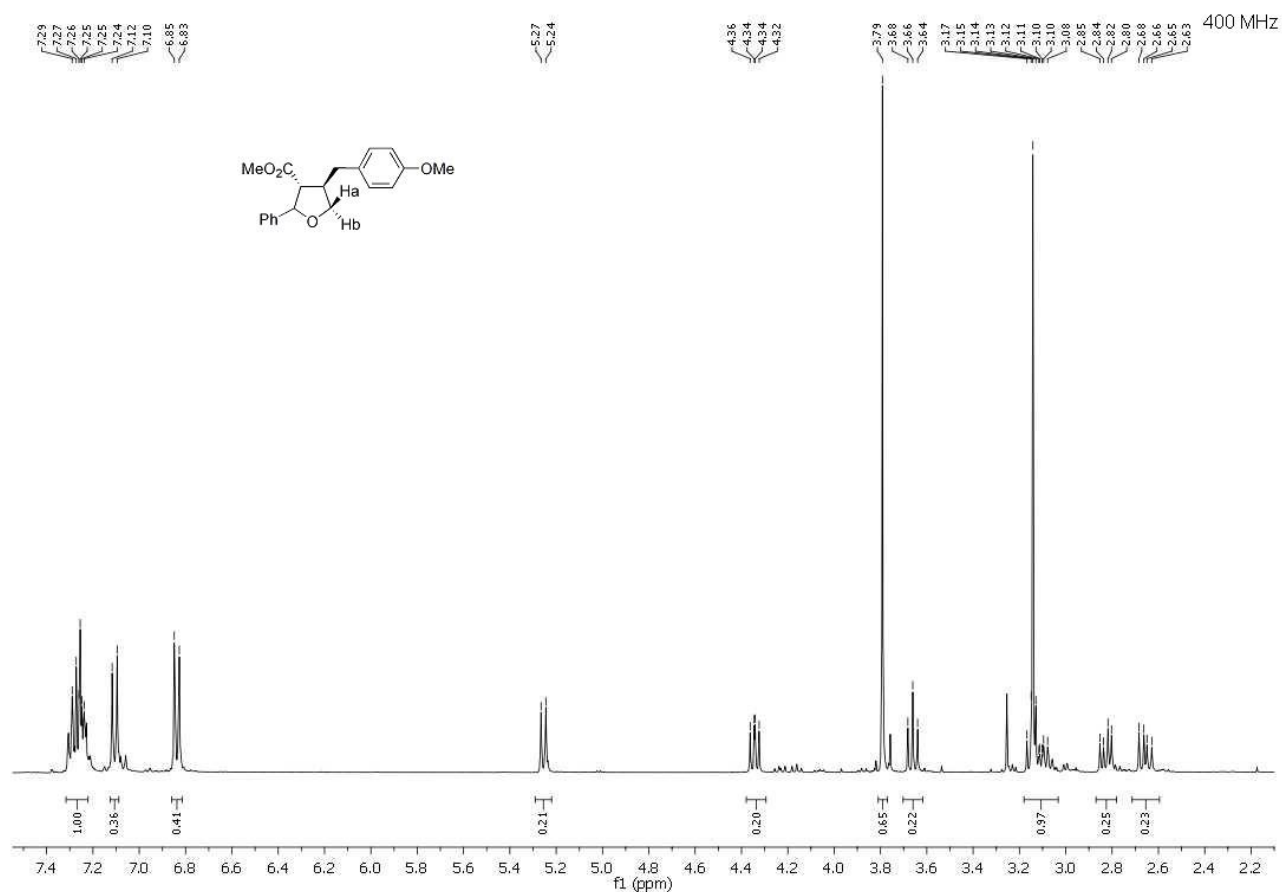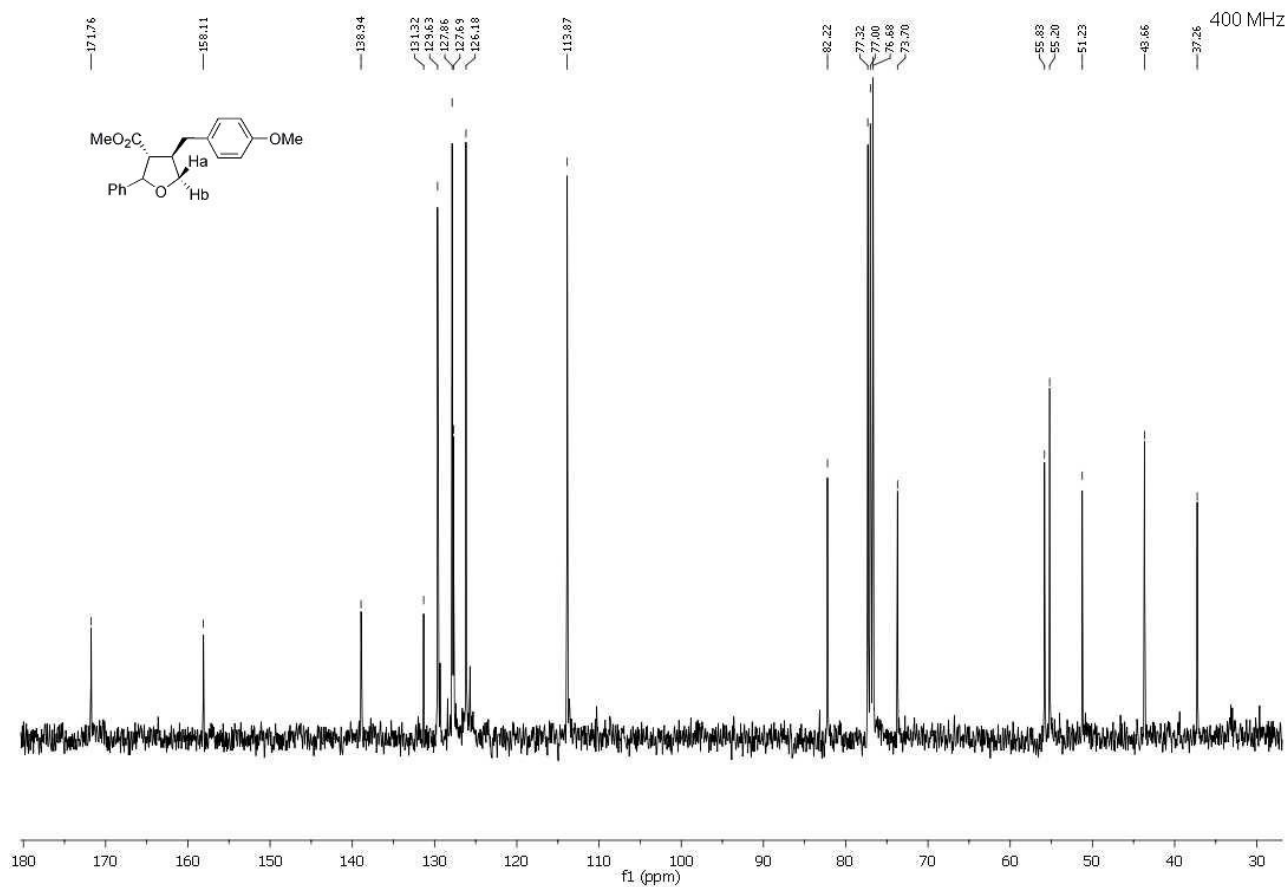

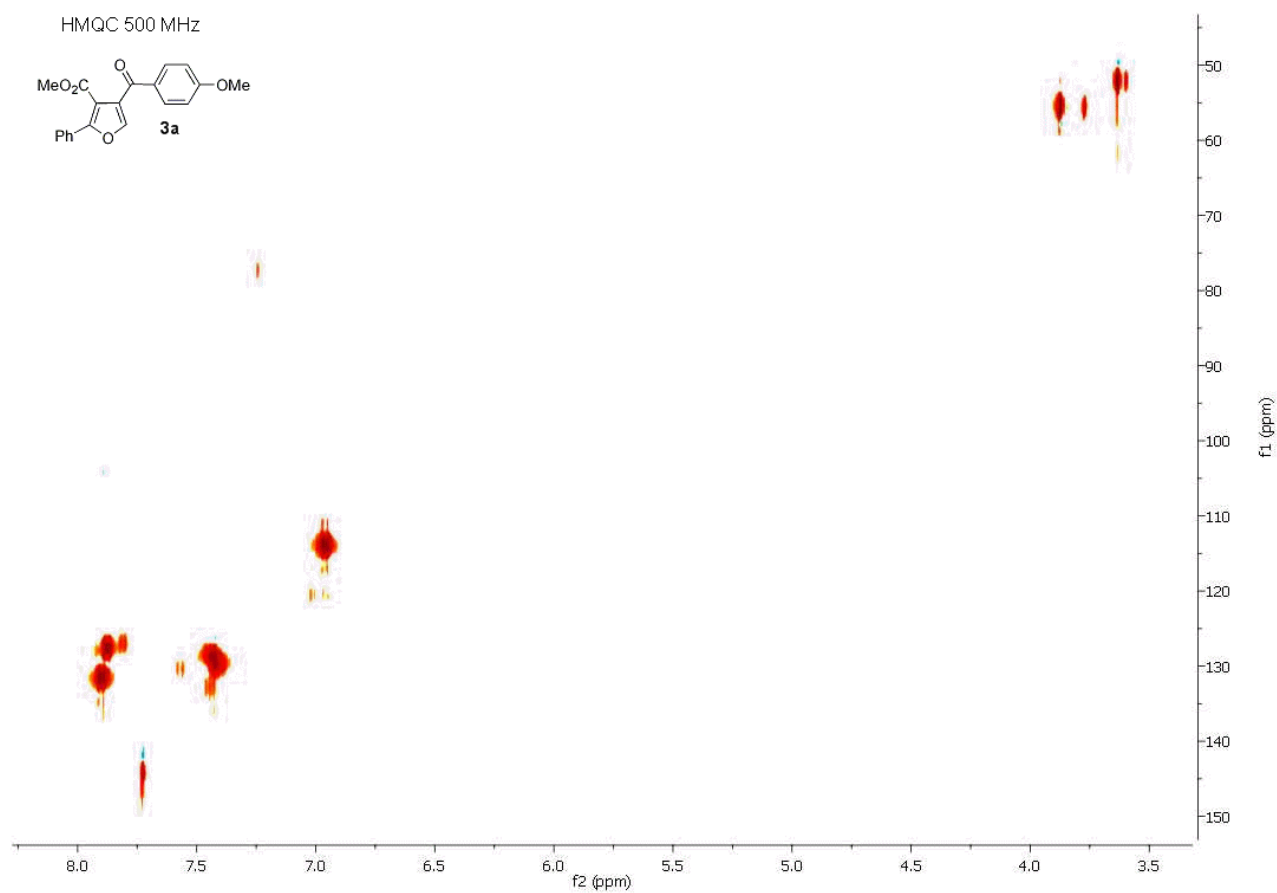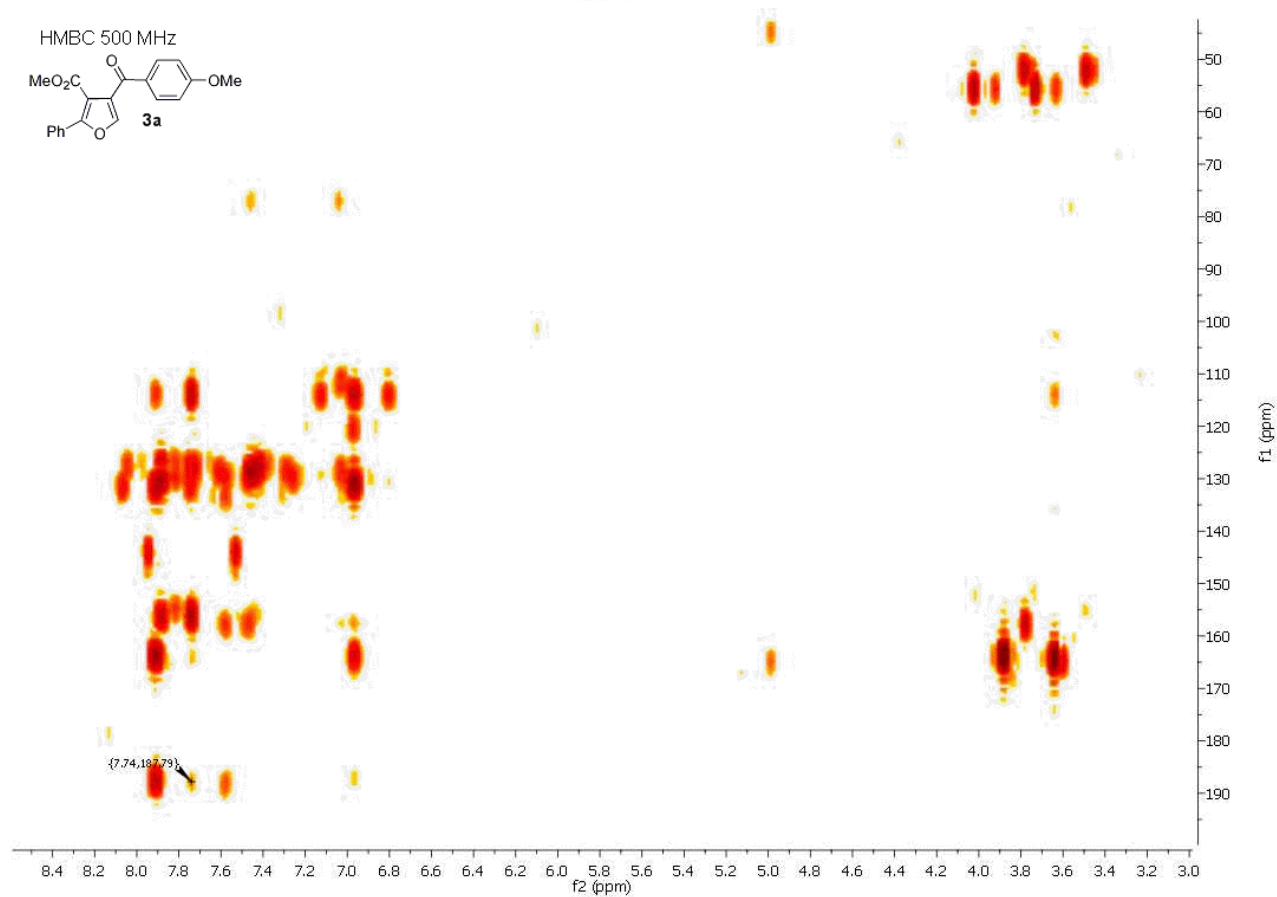



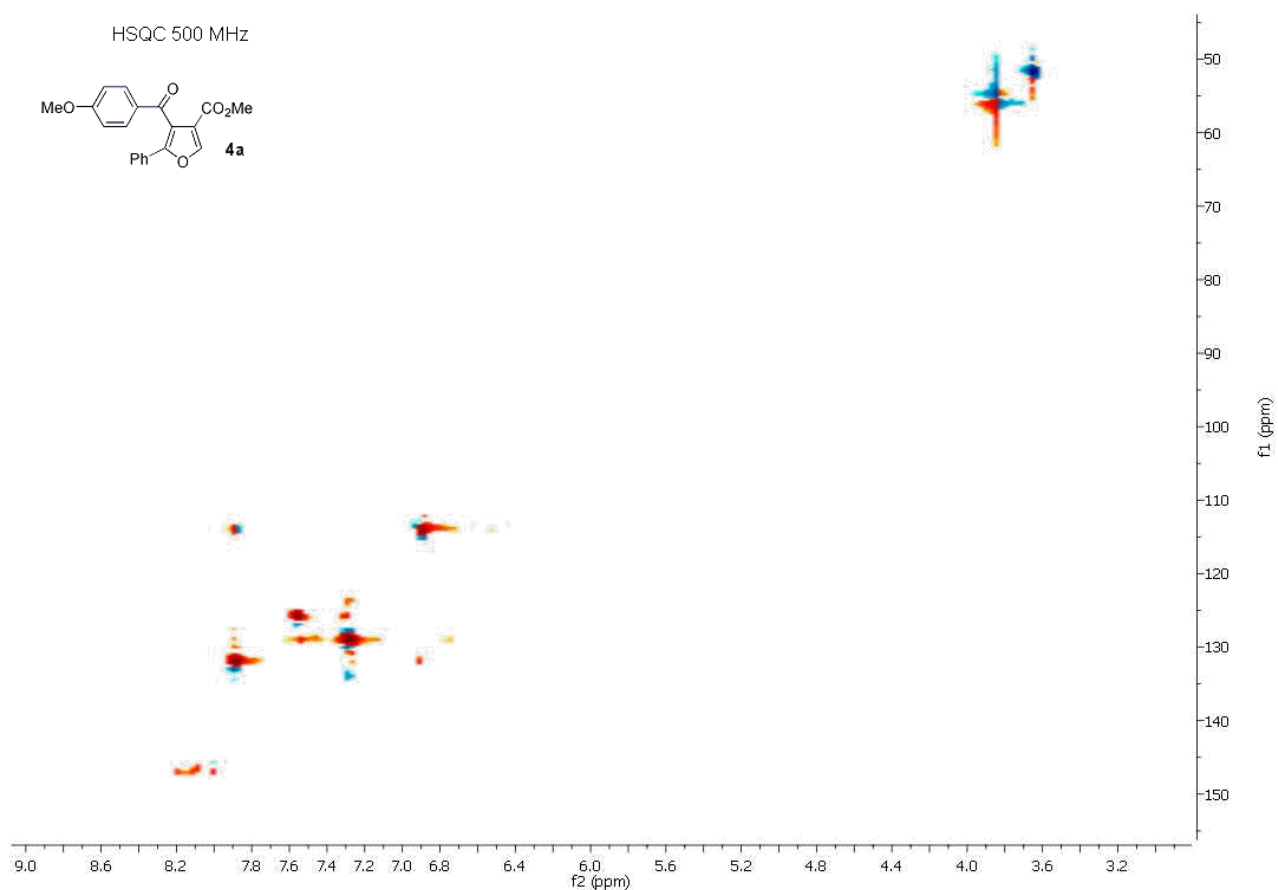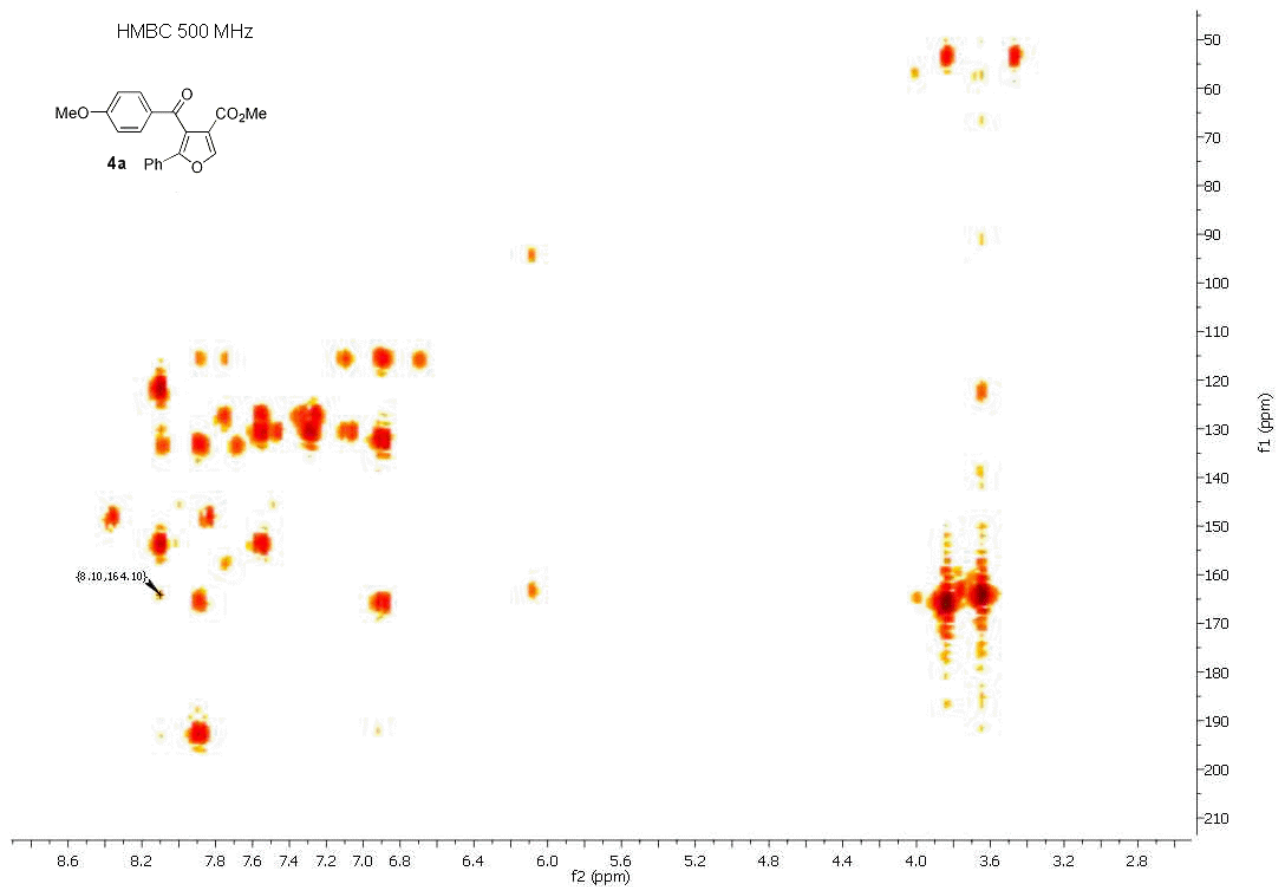

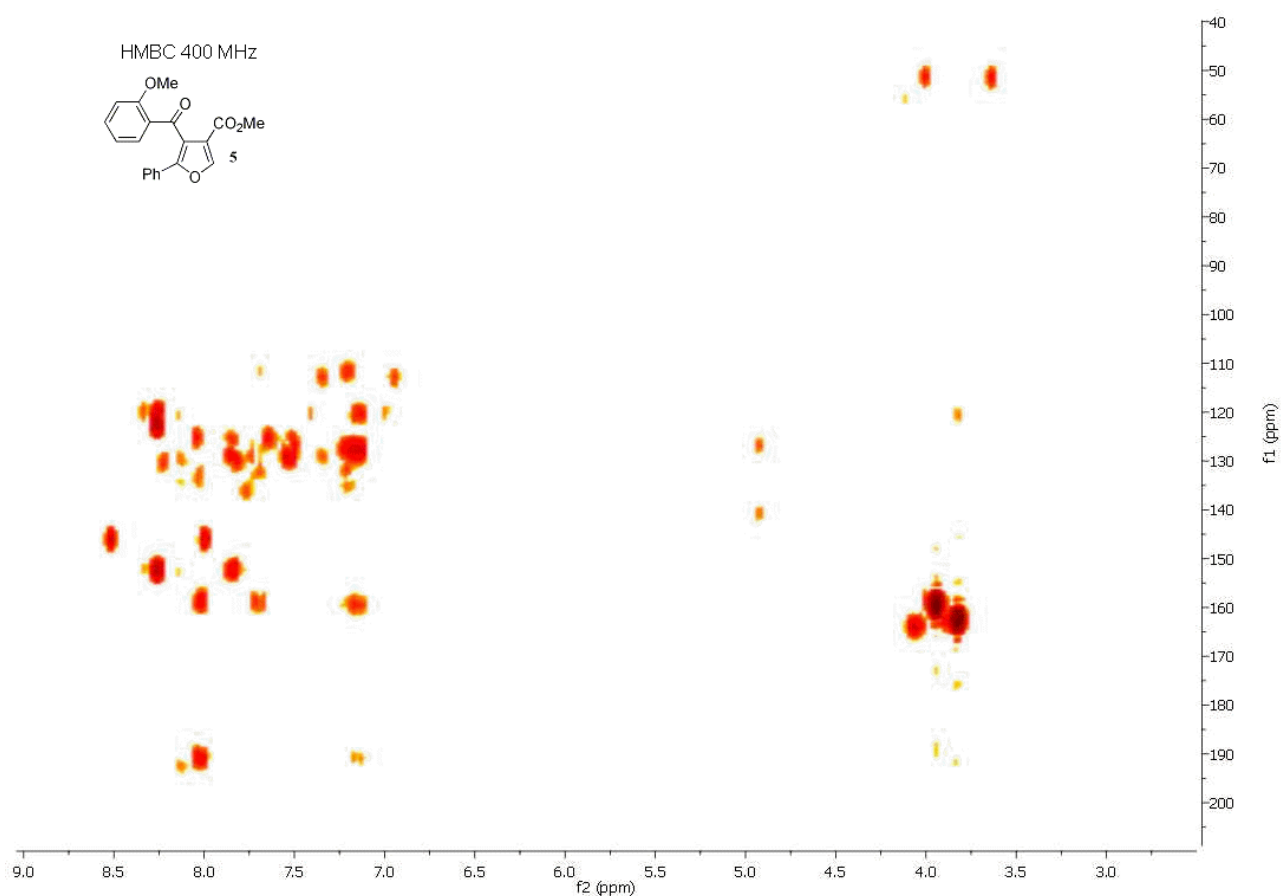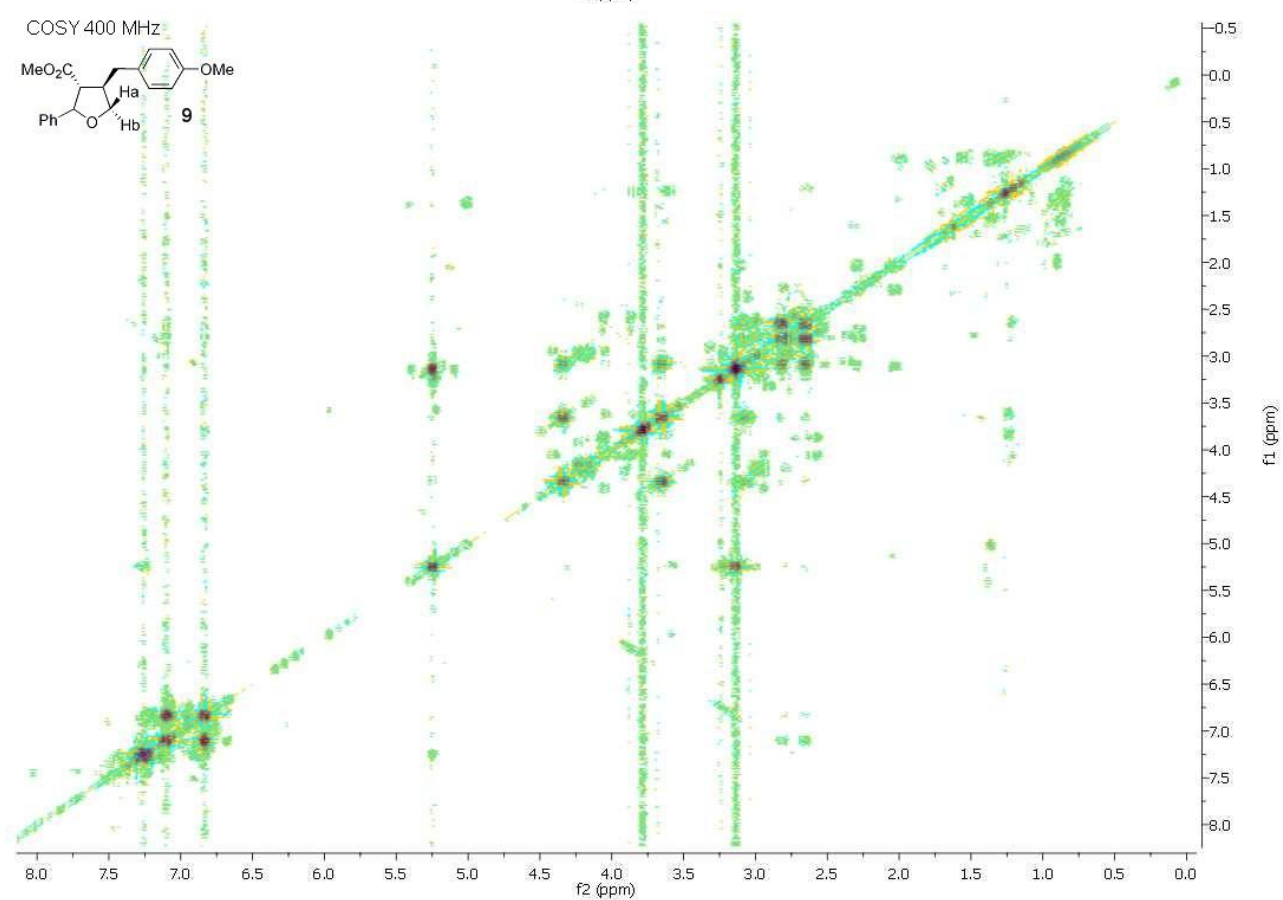

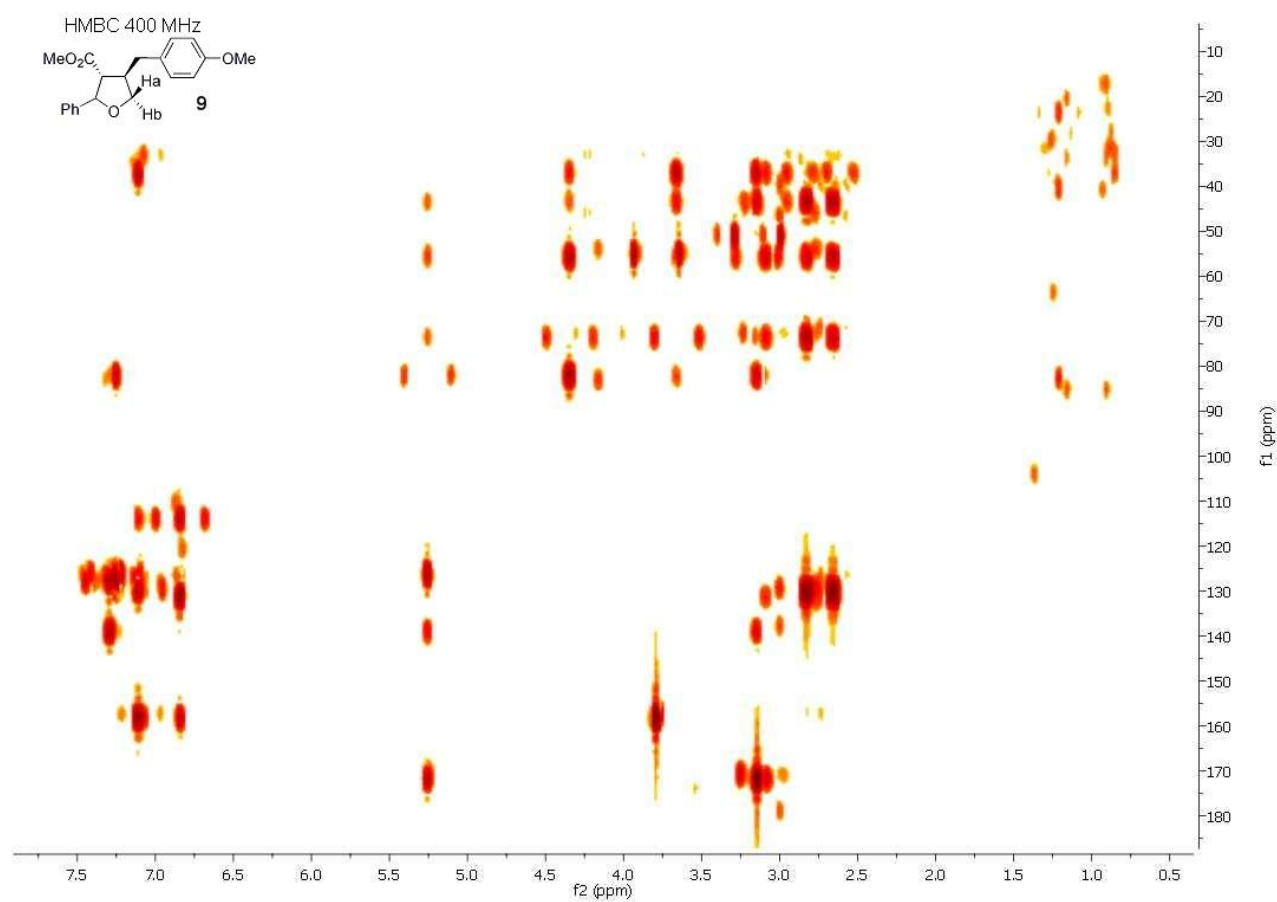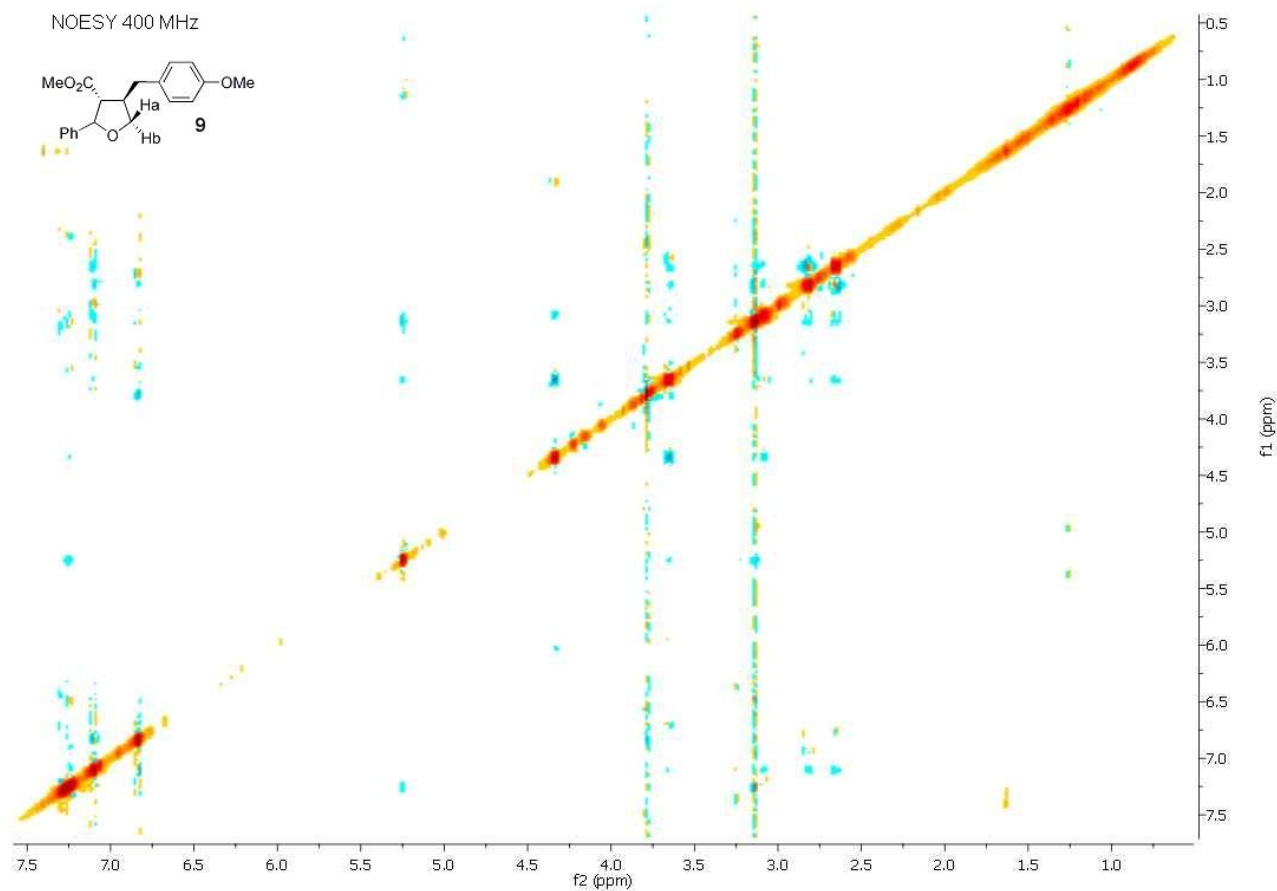

Supplement: c1ob06560b.pdf [file c1ob06560b.pdf]
